# Supplementary material for: Theoretical insights into the reaction mechanisms between 2,3,7,8-tetrachlorodibenzofuran and the methylidyne radical
Source: Royal Society of Chemistry journal article supplement (doi:10.1039/c8ra03046d), 2018-01-01
Supplement: c8ra03046d1.pdf [file c8ra03046d1.pdf]

**Theoretical insights into the reaction mechanisms between 2,3,7,8-  
tetrachlorodibenzofuran and methylidyne radical**

Wenjing Wei, Weihua Wang\*, Kaining Xu, Wenling Feng, Xiaoping Li, Ping Li\*  
Key Laboratory of Life-Organic Analysis, School of Chemistry and Chemical Engineering, Qufu  
Normal University, Qufu, 273165, P. R. China

**E-mail:** lignip@163.com (Ping Li); wwh78@163.com (Weihua Wang)

Supplementary Material

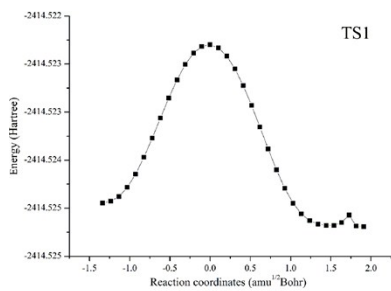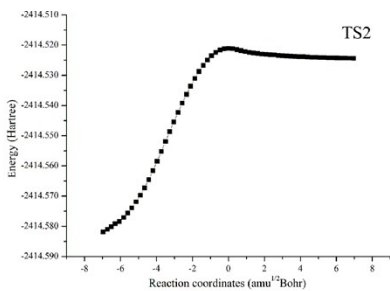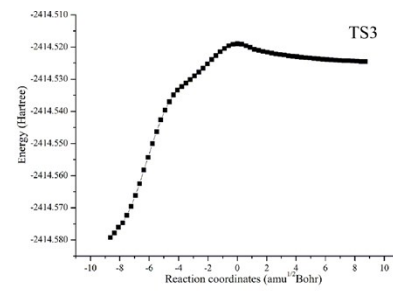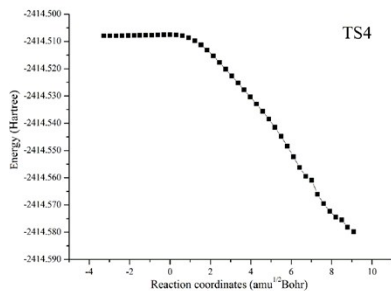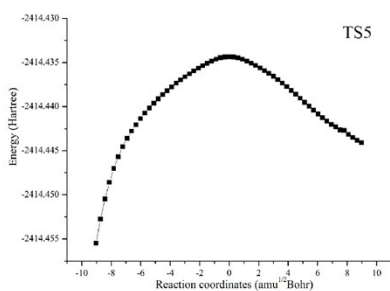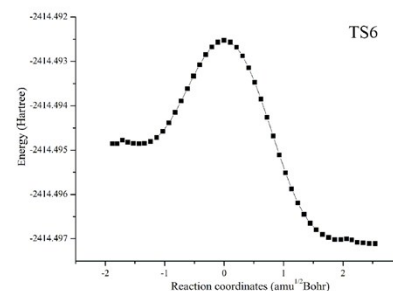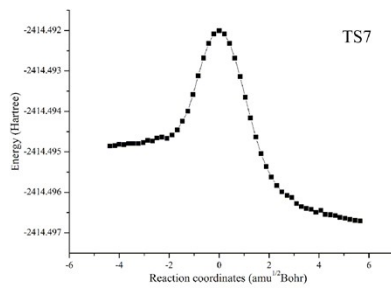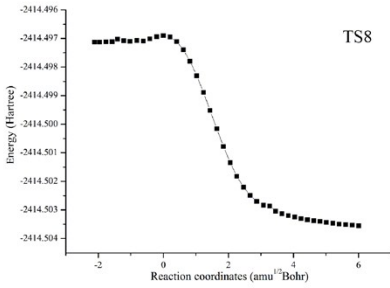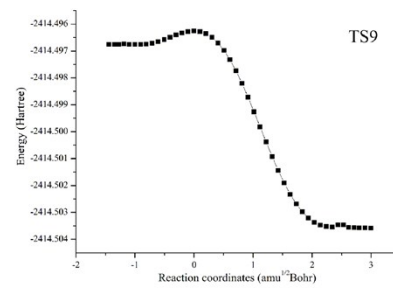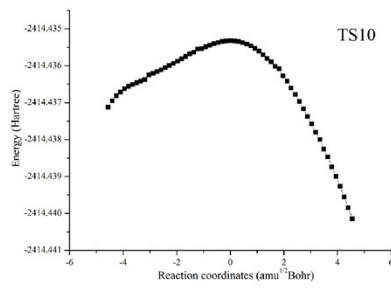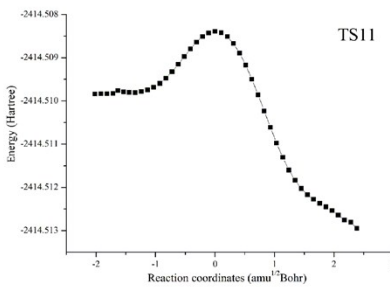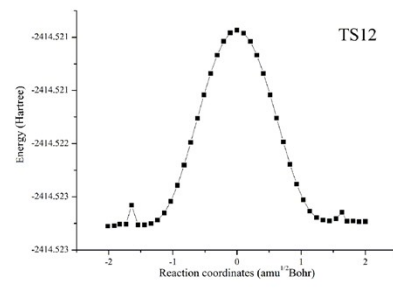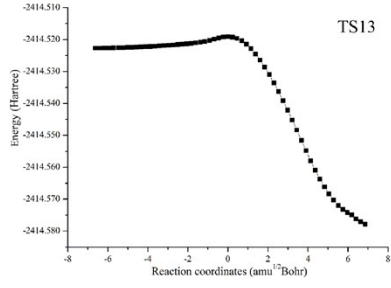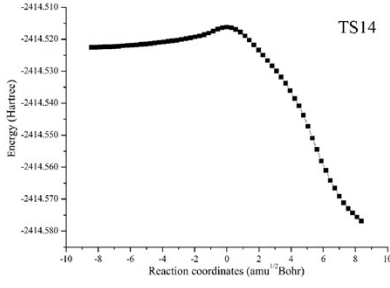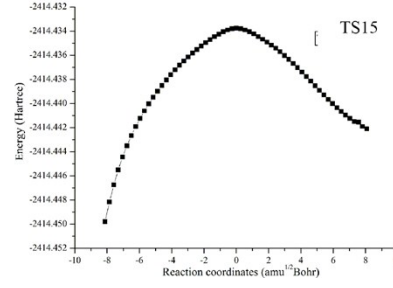

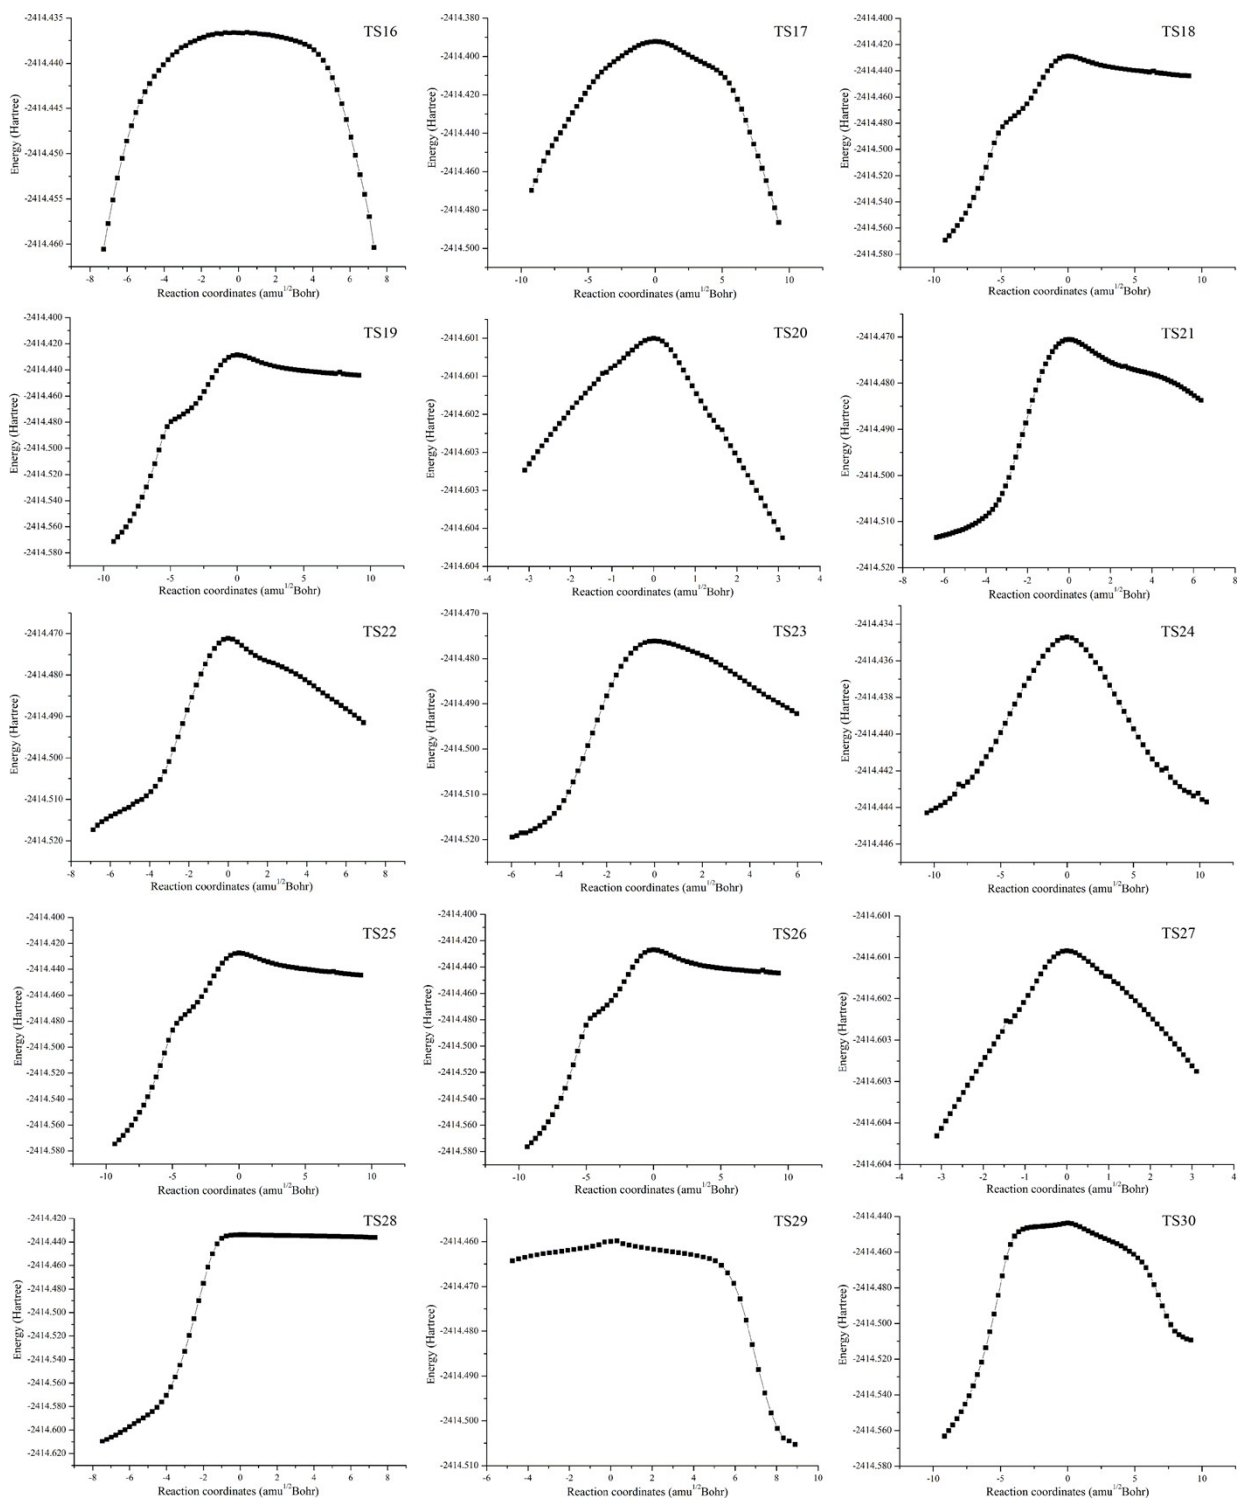

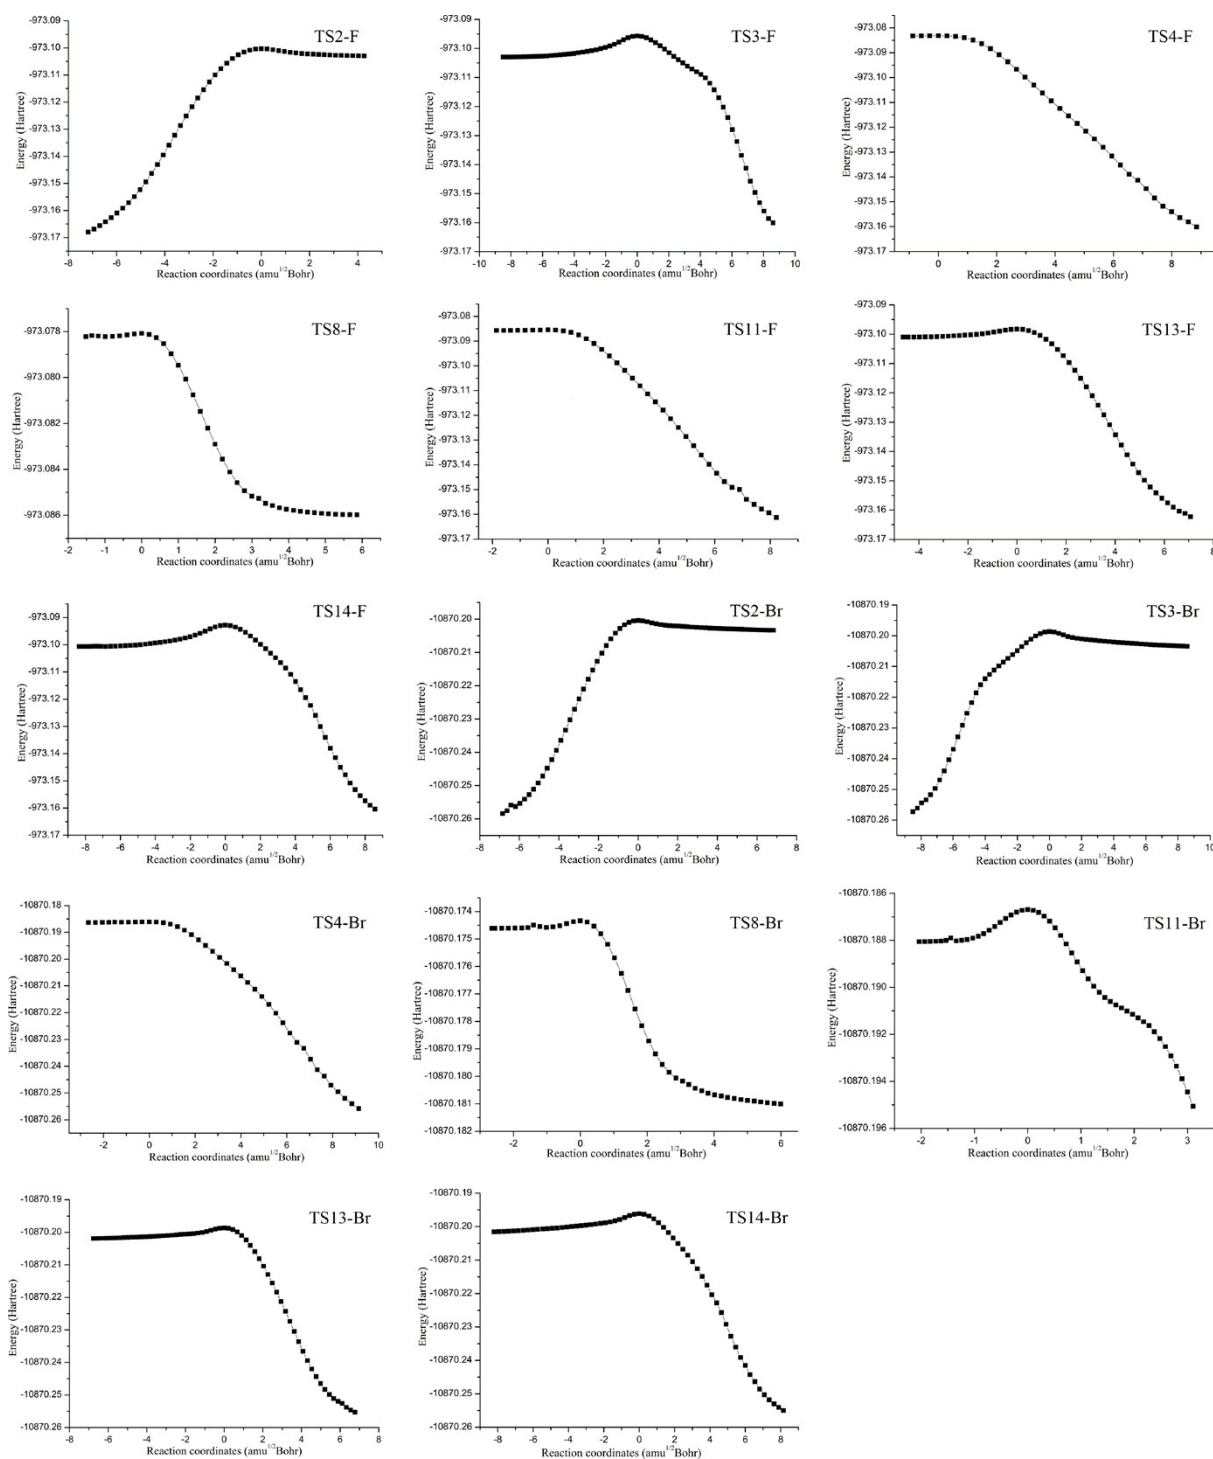

**Figure S1.** All the IRC calculations on the basis of the corresponding transition states at the B3LYP/6-311++G(d,p) level of theory.

**Table S1.** The Cartesian coordinates of all the species mentioned in this study

| Species | x           | y           | z           | Species | x           | y           | z           |
|---------|-------------|-------------|-------------|---------|-------------|-------------|-------------|
|         |             | IM1         |             |         |             | IM2         |             |
| C       | -3.08579800 | 0.74932800  | 0.19499300  | C       | -3.09090500 | 0.75459400  | 0.19668600  |
| C       | -1.58385800 | 1.22889400  | 0.35356000  | C       | -1.59228700 | 1.23634300  | 0.33323400  |
| C       | -0.57488600 | 0.16429400  | 0.23737700  | C       | -0.57170800 | 0.18098100  | 0.21737600  |
| C       | -0.95386400 | -1.14451300 | 0.14899600  | C       | -0.95586300 | -1.12796000 | 0.13344700  |
| C       | -2.29930600 | -1.61834400 | 0.08472100  | C       | -2.30279400 | -1.60296300 | 0.06588500  |
| C       | -3.30719500 | -0.71947200 | 0.07289200  | C       | -3.31689200 | -0.70677200 | 0.05622900  |
| C       | 1.22612400  | -1.18139000 | 0.00959200  | C       | 1.22518800  | -1.17225700 | 0.00120700  |
| C       | 0.85779700  | 0.17367700  | 0.12367400  | C       | 0.86120900  | 0.18451300  | 0.11125800  |
| C       | 2.53649800  | -1.60784100 | -0.09521500 | C       | 2.53439600  | -1.60360600 | -0.09827000 |
| C       | 1.86170300  | 1.14694300  | 0.12938400  | C       | 1.86852900  | 1.15431600  | 0.11913900  |
| C       | 3.52321500  | -0.62384700 | -0.09390900 | C       | 3.52454300  | -0.62307100 | -0.09482400 |
| C       | 3.18590000  | 0.74173700  | 0.01597500  | C       | 3.19169700  | 0.74400100  | 0.01169300  |
| O       | 0.12229500  | -1.99032700 | 0.02557000  | O       | 0.11850700  | -1.97730400 | 0.01486500  |
| H       | 1.63230400  | 2.20038300  | 0.22114100  | H       | 1.64200100  | 2.20860600  | 0.20804900  |
| H       | -1.33441400 | 2.17315000  | -0.12955300 | H       | -1.38516400 | 2.18154900  | -0.16558600 |
| H       | -2.49851900 | -2.68060000 | 0.03486500  | H       | -2.49778900 | -2.66553600 | 0.00615400  |
| H       | 2.79368300  | -2.65479200 | -0.17910400 | H       | 2.78820900  | -2.65155700 | -0.17994900 |
| Cl      | 4.43026900  | 1.97226900  | 0.01964400  | Cl      | 4.44048400  | 1.96974100  | 0.01800600  |
| Cl      | 5.18892200  | -1.13066100 | -0.23236300 | Cl      | 5.18885000  | -1.13603000 | -0.22601600 |
| Cl      | -4.15665300 | 1.78387300  | -0.82715500 | Cl      | -4.18322800 | 1.82265700  | -0.76839700 |
| Cl      | -4.96017700 | -1.27237000 | -0.01213000 | Cl      | -4.96556100 | -1.26738700 | -0.04779300 |
| C       | -2.58374900 | 1.31483900  | 1.43273100  | C       | -2.55623100 | 1.28258200  | 1.44072100  |
| H       | -2.92701900 | 2.13577900  | 2.04352300  | H       | -2.57785700 | 0.92847700  | 2.46113000  |
|         |             | IM3         |             |         |             | IM4         |             |
| C       | -3.07161000 | 0.72453400  | -0.09645800 | C       | -2.87550600 | 0.85185500  | 0.03235400  |
| C       | -1.76143900 | 1.29318500  | 0.27448200  | C       | -1.64807600 | 1.21210200  | 0.45341600  |
| C       | -0.62460800 | 0.19997400  | 0.64484100  | C       | -0.69245900 | 0.20625400  | 0.93947400  |
| C       | -1.04307400 | -1.19763200 | 0.42773400  | C       | -1.11964100 | -1.31188700 | 0.76671700  |
| C       | -2.30980400 | -1.60081900 | 0.22190000  | C       | -2.41183400 | -1.56988700 | 0.12986200  |
| C       | -3.33818100 | -0.60342000 | 0.00413800  | C       | -3.25999400 | -0.55628600 | -0.13155600 |
| C       | 1.15768600  | -1.17368800 | 0.16293300  | C       | 1.05654800  | -1.17680200 | 0.19353700  |
| C       | 0.82748400  | 0.17295600  | 0.32723900  | C       | 0.74680100  | 0.14891000  | 0.54038900  |
| C       | 2.44667000  | -1.60358700 | -0.08144100 | C       | 2.32466800  | -1.54868300 | -0.21281400 |
| C       | 1.82054400  | 1.13551600  | 0.26033800  | C       | 1.72752800  | 1.12490700  | 0.46140200  |
| C       | 3.44158200  | -0.62528000 | -0.16496300 | C       | 3.30723600  | -0.55694500 | -0.28502700 |
| C       | 3.13378100  | 0.73268600  | 0.00284200  | C       | 3.01406300  | 0.77222200  | 0.04499400  |
| O       | 0.06494700  | -2.00725500 | 0.27468000  | O       | 0.00003700  | -2.05089500 | 0.26186600  |
| H       | 1.60437800  | 2.18664900  | 0.40184700  | H       | 1.52041400  | 2.15506100  | 0.72168500  |
| H       | -1.44123200 | 2.17827900  | -0.27082600 | H       | -1.33793200 | 2.24865100  | 0.39628600  |
| H       | -2.54933300 | -2.64262400 | 0.06055000  | H       | -2.66496700 | -2.59136600 | -0.12606000 |
| H       | 2.68466200  | -2.65056600 | -0.20918900 | H       | 2.55189600  | -2.57148100 | -0.48011300 |

|    |             |             |             |    |             |             |             |
|----|-------------|-------------|-------------|----|-------------|-------------|-------------|
| CI | 4.37279600  | 1.96198000  | -0.09596000 | CI | 4.23341000  | 2.02254400  | -0.03842100 |
| CI | 5.07618300  | -1.14688500 | -0.48542700 | CI | 4.90608000  | -1.02658100 | -0.80476400 |
| CI | -4.24396700 | 1.88705300  | -0.66457100 | CI | -3.99862500 | 2.10173300  | -0.46197600 |
| CI | -4.94067200 | -1.23308200 | -0.30823400 | CI | -4.83723200 | -0.93351800 | -0.78893000 |
| C  | -1.26843000 | 1.07060600  | 1.62970300  | C  | -0.98119200 | -0.70565600 | 2.07860300  |
| H  | -1.77543700 | 0.86199900  | 2.56171700  | H  | -0.36032800 | -0.96533600 | 2.92474100  |
|    |             | IM5         |             |    |             | IM6         |             |
| C  | -2.87408200 | 0.84759900  | 0.02850600  | C  | -2.93988400 | 0.84862000  | 0.09671200  |
| C  | -1.63627400 | 1.22810700  | 0.41411800  | C  | -1.56253300 | 1.16819000  | 0.38471500  |
| C  | -0.68317200 | 0.23327300  | 0.91141000  | C  | -0.63046000 | 0.18845600  | 0.49919900  |
| C  | -1.10954200 | -1.32527900 | 0.73953400  | C  | -1.01574900 | -1.23357900 | 0.56196100  |
| C  | -2.38867400 | -1.58435000 | 0.09922600  | C  | -2.50736800 | -1.59052700 | 0.13793900  |
| C  | -3.24976500 | -0.56496600 | -0.12964900 | C  | -3.36186600 | -0.42277800 | -0.14372200 |
| C  | 1.07487000  | -1.17529000 | 0.19807500  | C  | 1.17071700  | -1.16262300 | 0.11351100  |
| C  | 0.75662200  | 0.15196700  | 0.51213400  | C  | 0.81301400  | 0.17543900  | 0.34786600  |
| C  | 2.35231700  | -1.55640400 | -0.17172200 | C  | 2.47000700  | -1.54445600 | -0.16915000 |
| C  | 1.73403300  | 1.12956700  | 0.42676600  | C  | 1.79278200  | 1.16380300  | 0.30541900  |
| C  | 3.33229200  | -0.56458100 | -0.25184500 | C  | 3.44440300  | -0.54508100 | -0.19553400 |
| C  | 3.02803900  | 0.77124700  | 0.03886400  | C  | 3.11091000  | 0.79994200  | 0.04263800  |
| O  | 0.01558500  | -2.04309800 | 0.25515500  | O  | 0.11186900  | -2.02351700 | 0.17509400  |
| H  | 1.52099100  | 2.16422300  | 0.66281500  | H  | 1.55264800  | 2.20524600  | 0.47562100  |
| H  | -1.33475900 | 2.26418000  | 0.31851900  | H  | -1.27885600 | 2.21249600  | 0.36461700  |
| H  | -2.63651300 | -2.59699000 | -0.19388200 | H  | -2.66339300 | -2.47297200 | -0.47947800 |
| H  | 2.58618100  | -2.58543200 | -0.40739700 | H  | 2.72998600  | -2.57735000 | -0.35491300 |
| CI | 4.24322700  | 2.02490900  | -0.05819000 | CI | 4.33054400  | 2.05315700  | 0.01358800  |
| CI | 4.94192100  | -1.04035100 | -0.73429600 | CI | 5.09104200  | -1.01731700 | -0.52628800 |
| CI | -4.01724100 | 2.08475000  | -0.45431800 | CI | -4.00992700 | 2.21776200  | -0.12266600 |
| CI | -4.83244100 | -0.94899200 | -0.76875600 | CI | -4.92662000 | -0.78479100 | -0.82068200 |
| C  | -1.02899200 | -0.65989100 | 2.03040400  | C  | -1.97696900 | -1.78294900 | 1.49522600  |
| H  | -1.80955600 | -0.53258700 | 2.76829200  | H  | -2.32302600 | -1.52382600 | 2.48554400  |
|    |             | IM7         |             |    |             | IM8         |             |
| C  | -2.89538400 | 0.90622300  | 0.12761700  | C  | -2.90560600 | 0.89642600  | 0.10656600  |
| C  | -1.58893600 | 1.22692000  | 0.20533100  | C  | -1.59534200 | 1.21368700  | 0.17853200  |
| C  | -0.58119000 | 0.19511500  | 0.23757200  | C  | -0.58543300 | 0.18059900  | 0.21380800  |
| C  | -0.93581900 | -1.12164900 | 0.27221300  | C  | -0.93393400 | -1.13902800 | 0.23890500  |
| C  | -2.30085400 | -1.63097800 | 0.31302800  | C  | -2.30530100 | -1.63700700 | 0.28395300  |
| C  | -3.39703900 | -0.49860700 | 0.14463700  | C  | -3.39714900 | -0.50669000 | 0.14673800  |
| C  | 1.24062600  | -1.14450600 | 0.09300600  | C  | 1.24334400  | -1.15135000 | 0.07707100  |
| C  | 0.86198100  | 0.20801800  | 0.13814400  | C  | 0.85815400  | 0.19961900  | 0.12182100  |
| C  | 2.55115700  | -1.56991300 | -0.00710900 | C  | 2.55618200  | -1.57087700 | -0.01659600 |
| C  | 1.85596800  | 1.18586800  | 0.07253100  | C  | 1.84850200  | 1.18180800  | 0.06327400  |
| C  | 3.53099600  | -0.58085100 | -0.06906400 | C  | 3.53214500  | -0.57753200 | -0.07091900 |
| C  | 3.18385800  | 0.78484200  | -0.02963200 | C  | 3.17868800  | 0.78661600  | -0.03127100 |
| O  | 0.13771200  | -1.96182400 | 0.16586000  | O  | 0.14351300  | -1.97373400 | 0.14184800  |

|    |             |             |             |    |             |             |             |
|----|-------------|-------------|-------------|----|-------------|-------------|-------------|
| H  | 1.61986100  | 2.24144200  | 0.10074800  | H  | 1.60782600  | 2.23635800  | 0.09130000  |
| H  | -1.29855400 | 2.26941900  | 0.23774000  | H  | -1.30169400 | 2.25560600  | 0.19917800  |
| H  | -2.46582500 | -2.57023500 | -0.21313600 | H  | -2.51093300 | -2.55871100 | -0.25714800 |
| H  | 2.81417700  | -2.61828700 | -0.03829200 | H  | 2.82376500  | -2.61808000 | -0.04857200 |
| Cl | 4.41693800  | 2.02372700  | -0.10991400 | Cl | 4.40682500  | 2.03092000  | -0.10135300 |
| Cl | 5.19914700  | -1.08376800 | -0.19746300 | Cl | 5.20310000  | -1.07290700 | -0.19024600 |
| Cl | -4.10766900 | 2.16799100  | 0.09584100  | Cl | -4.11170200 | 2.16273800  | 0.05963600  |
| Cl | -4.75390400 | -0.85957200 | -0.98957300 | Cl | -4.80193000 | -0.89252700 | -0.92090000 |
| C  | -3.29121500 | -1.28585700 | 1.35470500  | C  | -3.23727700 | -1.27571100 | 1.36649000  |
| H  | -4.00297100 | -1.89792400 | 1.88704500  | H  | -3.14589400 | -1.00846800 | 2.40888600  |
|    |             | IM9         |             |    |             | IM10        |             |
| C  | -2.75806900 | 1.08500500  | 0.00005000  | C  | -2.90633300 | 0.42801000  | -0.00004300 |
| C  | -1.40435600 | 1.40195800  | 0.00003600  | C  | -1.61532100 | 0.92353900  | -0.00007600 |
| C  | -0.47418000 | 0.36227300  | -0.00000200 | C  | -0.57163900 | -0.00119900 | -0.00010200 |
| C  | -0.92882900 | -0.96752200 | 0.00000300  | C  | -0.86750700 | -1.37471300 | -0.00004300 |
| C  | -2.26686500 | -1.31663800 | 0.00002500  | C  | -2.15709400 | -1.87665300 | 0.00000800  |
| C  | -3.16214700 | -0.25957800 | 0.00004100  | C  | -3.19383800 | -0.94613900 | -0.00000700 |
| C  | 1.25887800  | -1.10096300 | -0.00003500 | C  | 1.32161200  | -1.25082800 | -0.00001800 |
| C  | 0.97239200  | 0.27337100  | -0.00009700 | C  | 0.87561300  | 0.07965100  | 0.00000400  |
| C  | 2.54563000  | -1.60620700 | -0.00000200 | C  | 2.65769400  | -1.60272400 | -0.00000300 |
| C  | 2.02602800  | 1.18632200  | -0.00011300 | C  | 1.81398900  | 1.11037700  | 0.00001300  |
| C  | 3.58844200  | -0.68138600 | -0.00001200 | C  | 3.58486400  | -0.56140200 | 0.00002900  |
| C  | 3.33069500  | 0.70461100  | -0.00006600 | C  | 3.16646400  | 0.78443100  | 0.00002100  |
| O  | 0.11475900  | -1.85938300 | -0.00002100 | O  | 0.27075600  | -2.13944800 | -0.00004200 |
| H  | 1.85294000  | 2.25453500  | -0.00012700 | H  | 1.51373700  | 2.15001300  | -0.00001800 |
| H  | -1.09982300 | 2.44033400  | 0.00000200  | H  | -1.47339300 | 1.99941300  | -0.00007300 |
| H  | -2.63591700 | -2.33685400 | -0.00000900 | H  | -2.36035400 | -2.93859400 | 0.00004500  |
| H  | 2.74276900  | -2.66929400 | 0.00004800  | H  | 2.97909000  | -2.63500500 | -0.00001900 |
| Cl | 4.64182300  | 1.86119900  | -0.00001600 | Cl | 4.33333600  | 2.08585900  | -0.00001200 |
| Cl | 5.22335400  | -1.28973000 | 0.00008300  | Cl | 5.27991100  | -0.97541100 | 0.00003500  |
| Cl | -3.93222600 | 2.38227900  | 0.00003200  | Cl | -4.26080900 | 1.58851300  | -0.00003500 |
| Cl | -4.90269800 | -0.63331200 | 0.00001800  | Cl | -4.84113100 | -1.52663200 | 0.00005900  |
| C  | -4.93414500 | -2.68025300 | -0.00009800 | C  | -3.31130800 | 3.40187500  | 0.00019600  |
| H  | -6.05321700 | -2.66703600 | -0.00011900 | H  | -4.30051100 | 3.92481900  | -0.00025800 |
|    |             | P1          |             |    |             | P2          |             |
| C  | -3.55993400 | 0.75383000  | 0.00015900  | C  | -2.94471600 | 0.80285100  | 0.02597300  |
| C  | -1.18307500 | 1.66617400  | 0.00002900  | C  | -1.60261900 | 1.28475800  | 0.14992500  |
| C  | -0.39211700 | 0.47072800  | -0.00017300 | C  | -0.65610500 | 0.55823600  | 0.82045400  |
| C  | -0.89053300 | -0.83852000 | 0.00008000  | C  | -1.18699700 | -1.52018400 | 0.63073800  |
| C  | -2.18560100 | -1.36329000 | -0.00021600 | C  | -2.30987300 | -1.60796000 | -0.13548700 |
| C  | -3.38659100 | -0.62316900 | -0.00020400 | C  | -3.27019600 | -0.54574700 | -0.11193300 |
| C  | 1.30998000  | -1.02859600 | 0.00028000  | C  | 1.04811200  | -1.08954200 | 0.24671900  |
| C  | 1.03863400  | 0.34931800  | 0.00004800  | C  | 0.75605100  | 0.28850900  | 0.45283200  |
| C  | 2.58006700  | -1.56274500 | 0.00040000  | C  | 2.33488400  | -1.50790800 | -0.05279500 |

|    |             |             |             |    |             |             |             |
|----|-------------|-------------|-------------|----|-------------|-------------|-------------|
| C  | 2.11479300  | 1.24428600  | -0.00025300 | C  | 1.79315400  | 1.20944500  | 0.31971900  |
| C  | 3.64412700  | -0.65625400 | 0.00016600  | C  | 3.35471300  | -0.56682800 | -0.17397300 |
| C  | 3.40842700  | 0.73301800  | -0.00016600 | C  | 3.08457700  | 0.79540300  | 0.00499700  |
| O  | 0.14014800  | -1.74448000 | 0.00031300  | O  | 0.04477200  | -2.05424200 | 0.25450100  |
| H  | 1.96704800  | 2.31604700  | -0.00052300 | H  | 1.60158200  | 2.26206500  | 0.48338100  |
| H  | -0.63200500 | 2.60076800  | 0.00009900  | H  | -1.32874600 | 2.14310200  | -0.45528900 |
| H  | -2.26592400 | -2.44106900 | -0.00047900 | H  | -2.42231000 | -2.38982900 | -0.87794600 |
| H  | 2.75599800  | -2.62950400 | 0.00059800  | H  | 2.53690700  | -2.55887100 | -0.20968700 |
| Cl | 4.74277000  | 1.86473300  | -0.00050900 | Cl | 4.33993700  | 2.00176900  | -0.13684200 |
| Cl | 5.26743800  | -1.29752900 | 0.00034700  | Cl | 4.95913600  | -1.13150900 | -0.56066300 |
| Cl | -5.18459500 | 1.42078400  | 0.00062800  | Cl | -4.16049700 | 2.03362900  | -0.28786000 |
| Cl | -4.81263700 | -1.64633400 | -0.00068300 | Cl | -4.89692600 | -1.00204900 | -0.59553100 |
| C  | -2.53701500 | 1.77499300  | 0.00007100  | C  | -1.09144300 | -0.53838700 | 1.69131300  |
| H  | -2.93385500 | 2.78283500  | 0.00017600  | H  | -0.71092400 | -0.72967100 | 2.68784700  |
|    |             | P3          |             |    |             | P4          |             |
| C  | -2.91732500 | 0.80400800  | 0.05225100  | C  | -2.89699500 | 0.76954000  | 0.00003800  |
| C  | -1.59734400 | 1.31093800  | 0.20852100  | C  | -1.53688900 | 0.87707900  | 0.00068600  |
| C  | -0.63558500 | 0.54003500  | 0.83702500  | C  | -0.55220400 | -0.17212300 | 0.00039600  |
| C  | -1.16927200 | -1.52330000 | 0.65027200  | C  | -0.77775400 | -1.54511400 | 0.00028700  |
| C  | -2.33236100 | -1.64895000 | -0.08128400 | C  | -3.25228100 | -1.75423600 | -0.00010200 |
| C  | -3.25183300 | -0.56585800 | -0.09182000 | C  | -3.70212800 | -0.43303900 | -0.00012400 |
| C  | 1.05887400  | -1.09186500 | 0.24959000  | C  | 1.41236800  | -1.30852900 | 0.00019600  |
| C  | 0.76294100  | 0.28010200  | 0.44896800  | C  | 0.87726800  | -0.01052100 | 0.00037500  |
| C  | 2.34728800  | -1.51633500 | -0.03529900 | C  | 2.76339000  | -1.58434700 | -0.00004700 |
| C  | 1.79354400  | 1.20543900  | 0.30360000  | C  | 1.75737800  | 1.07784000  | 0.00025000  |
| C  | 3.36427500  | -0.57390100 | -0.15943900 | C  | 3.62837600  | -0.48825300 | -0.00010500 |
| C  | 3.08719900  | 0.79021600  | 0.00034500  | C  | 3.12532100  | 0.82920400  | 0.00004300  |
| O  | 0.03899000  | -2.02724300 | 0.21924100  | O  | 0.40464800  | -2.23673800 | 0.00011500  |
| H  | 1.60058500  | 2.25918900  | 0.45773100  | H  | 1.40327500  | 2.10017800  | 0.00038400  |
| H  | -1.34903600 | 2.22277900  | -0.32430600 | H  | -1.14398500 | 1.88591400  | 0.00113400  |
| H  | -2.49367200 | -2.47483700 | -0.76417000 | H  | -4.05077000 | -2.48781300 | -0.00025900 |
| H  | 2.55047900  | -2.56819100 | -0.18428400 | H  | 3.14436700  | -2.59610800 | -0.00022900 |
| Cl | 4.33903600  | 1.99885100  | -0.15263100 | Cl | 4.21329100  | 2.19897600  | -0.00003200 |
| Cl | 4.97351300  | -1.13624500 | -0.53116200 | Cl | 5.34605200  | -0.79874300 | -0.00035100 |
| Cl | -4.13723200 | 2.01875100  | -0.30882900 | Cl | -3.75158600 | 2.30773600  | -0.00019300 |
| Cl | -4.87053600 | -0.98469300 | -0.63414200 | Cl | -5.45268000 | -0.26256600 | -0.00026700 |
| C  | -1.14203600 | -0.52578700 | 1.68473200  | C  | -1.97161400 | -2.29249800 | 0.00014500  |
| H  | -2.01175300 | -0.37273100 | 2.31130100  | H  | -1.87180500 | -3.37014800 | 0.00013900  |
|    |             | P5          |             |    |             | P6          |             |
| C  | -2.79542300 | 1.43003900  | -0.00010900 | C  | -3.65763700 | 0.69251300  | -0.00005700 |
| C  | -1.43290900 | 1.39521400  | 0.00028600  | C  | -2.49456100 | 1.44367400  | -0.00005900 |
| C  | -0.61312800 | 0.21576200  | 0.00014800  | C  | -1.22280600 | 0.83130400  | 0.00007700  |
| C  | -1.03915000 | -1.11543500 | -0.00026300 | C  | -1.18930200 | -0.58494500 | 0.00000300  |
| C  | -2.31303800 | -1.71024700 | -0.00022100 | C  | -2.34554400 | -1.34417000 | 0.00015000  |



|    |             |             |             |    |             |             |             |
|----|-------------|-------------|-------------|----|-------------|-------------|-------------|
| C  | -3.50963100 | -0.99269500 | 0.00004200  | C  | -3.58848800 | -0.71055400 | 0.00012300  |
| C  | 1.16562300  | -1.19571000 | -0.00028700 | C  | 1.18929500  | -0.58479200 | 0.00007900  |
| C  | 0.82417400  | 0.16528800  | 0.00012500  | C  | 1.22277700  | 0.83147000  | 0.00035600  |
| C  | 2.46285400  | -1.66304400 | -0.00044100 | C  | 2.34550400  | -1.34410200 | 0.00001500  |
| C  | 1.85113300  | 1.11604700  | 0.00039900  | C  | 2.49462900  | 1.44372200  | 0.00029300  |
| C  | 3.47674000  | -0.70249200 | -0.00015300 | C  | 3.58848600  | -0.71057600 | 0.00004600  |
| C  | 3.16914600  | 0.67381800  | 0.00026400  | C  | 3.65767500  | 0.69254100  | 0.00013900  |
| O  | 0.03494100  | -1.96872900 | -0.00053100 | O  | 0.00002700  | -1.26782600 | -0.00044500 |
| H  | 1.64696800  | 2.17847600  | 0.00071800  | H  | 2.56215900  | 2.52419900  | 0.00043600  |
| H  | -0.91349600 | 2.34500900  | 0.00053700  | H  | -2.56195900 | 2.52415100  | -0.00005100 |
| H  | -2.35051900 | -2.79035000 | -0.00009100 | H  | -2.27965000 | -2.42383400 | 0.00023100  |
| H  | 2.69450200  | -2.71913200 | -0.00077300 | H  | 2.27947400  | -2.42375500 | -0.00011600 |
| Cl | 4.44263900  | 1.87297500  | 0.00060500  | Cl | 5.19550300  | 1.52239200  | -0.00001900 |
| Cl | 5.13139800  | -1.25662900 | -0.00032100 | Cl | 5.02496900  | -1.69607500 | -0.00019400 |
| Cl | -3.52691500 | 3.03898400  | -0.00064300 | Cl | -5.19548200 | 1.52240000  | -0.00032200 |
| Cl | -4.95750800 | -2.00153200 | 0.00067100  | Cl | -5.02498000 | -1.69601500 | 0.00022500  |
| C  | -3.76036300 | 0.37392100  | -0.00004600 | C  | -0.00006600 | 1.54666400  | 0.00019600  |
| H  | -4.79658300 | 0.67845400  | 0.00009500  | H  | -0.00017000 | 2.62941800  | 0.00018800  |
|    |             | P7          |             |    |             | P8          |             |
| C  | -2.72368800 | 0.73595600  | -0.00006600 | C  | -2.69194800 | 1.23146800  | -0.00001500 |
| C  | -1.39760100 | 1.13094300  | 0.00000200  | C  | -1.34148700 | 1.50645700  | -0.00001800 |
| C  | -0.38651600 | 0.16532700  | -0.00003800 | C  | -0.43623100 | 0.43553800  | -0.00004700 |
| C  | -0.75682900 | -1.19371700 | -0.00009700 | C  | -0.94238800 | -0.87996500 | -0.00003400 |
| C  | -2.05721200 | -1.61832400 | -0.00011100 | C  | -2.27952800 | -1.18375700 | -0.00003100 |
| C  | -3.11577700 | -0.64962800 | -0.00011300 | C  | -3.21822400 | -0.11028900 | -0.00004100 |
| C  | 1.43894000  | -1.17870200 | 0.00003900  | C  | 1.24416700  | -1.08544200 | 0.00002400  |
| C  | 1.05636500  | 0.17557400  | 0.00015800  | C  | 0.99961700  | 0.30039900  | 0.00000200  |
| C  | 2.75648100  | -1.59157400 | -0.00001000 | C  | 2.51333800  | -1.62940100 | 0.00003100  |
| C  | 2.04680400  | 1.15871600  | 0.00013600  | C  | 2.08446400  | 1.17894600  | -0.00002500 |
| C  | 3.73463300  | -0.59577000 | 0.00002000  | C  | 3.58667800  | -0.73755000 | 0.00002400  |
| C  | 3.38182800  | 0.76801700  | 0.00008000  | C  | 3.37287300  | 0.65528400  | -0.00000700 |
| O  | 0.35030800  | -2.01523100 | -0.00004200 | O  | 0.07743800  | -1.80685900 | -0.00000800 |
| H  | 1.80018600  | 2.21229200  | 0.00021800  | H  | 1.94574600  | 2.25213600  | -0.00006900 |
| H  | -1.16304800 | 2.18744400  | 0.00004300  | H  | -1.00083800 | 2.53371200  | 0.00000500  |
| H  | -2.29492400 | -2.67427500 | -0.00009100 | H  | -2.62311000 | -2.20847800 | 0.00002500  |
| H  | 3.02833100  | -2.63806500 | -0.00008400 | H  | 2.67756500  | -2.69805800 | 0.00003900  |
| Cl | 4.61008800  | 2.01333500  | 0.00003800  | Cl | 4.72114400  | 1.76948700  | -0.00003800 |
| Cl | 5.40756900  | -1.09180800 | -0.00003100 | Cl | 5.20115000  | -1.39955500 | 0.00004100  |
| Cl | -3.90377100 | 2.03611900  | -0.00019900 | Cl | -3.79767000 | 2.59969300  | 0.00007300  |
| Cl | -5.94364000 | -0.44192100 | 0.00030800  | Cl | -5.30241700 | -1.91033700 | 0.00001100  |
| C  | -4.40562300 | -1.21392100 | -0.00022000 | C  | -4.60268500 | -0.33119700 | -0.00009200 |
| H  | -4.49803000 | -2.29024500 | -0.00039300 | H  | -5.32825400 | 0.46472800  | -0.00003400 |
|    |             | P9          |             |    |             | P10         |             |
| C  | -2.80901000 | 0.60466300  | -0.00005000 | C  | -2.98359500 | 0.33528900  | -0.00009200 |

|    |             |             |             |    |             |             |             |
|----|-------------|-------------|-------------|----|-------------|-------------|-------------|
| C  | -1.44234400 | 1.02515500  | 0.00058600  | C  | -1.64582500 | 0.81602600  | -0.00029400 |
| C  | -0.40823200 | 0.10794500  | 0.00057800  | C  | -0.58389600 | -0.07509600 | 0.00004400  |
| C  | -0.71403500 | -1.26465600 | 0.00008900  | C  | -0.84011400 | -1.45762800 | 0.00027700  |
| C  | -2.01219800 | -1.74163000 | -0.00010700 | C  | -2.12170200 | -1.98999200 | 0.00013300  |
| C  | -3.04521300 | -0.81230800 | -0.00011100 | C  | -3.17239400 | -1.09019900 | 0.00002000  |
| C  | 1.47627100  | -1.16220800 | 0.00050000  | C  | 1.34496800  | -1.27820000 | 0.00017600  |
| C  | 1.04312700  | 0.17321600  | 0.00088400  | C  | 0.86393000  | 0.04034300  | 0.00004900  |
| C  | 2.80871600  | -1.52666900 | 0.00003300  | C  | 2.68924600  | -1.59583200 | 0.00018200  |
| C  | 1.99310400  | 1.19189000  | 0.00053500  | C  | 1.77700000  | 1.09266200  | 0.00004000  |
| C  | 3.74799300  | -0.49533200 | -0.00009800 | C  | 3.59095400  | -0.53168700 | 0.00009700  |
| C  | 3.34345200  | 0.85316800  | 0.00014200  | C  | 3.13831000  | 0.80173100  | 0.00000400  |
| O  | 0.41856700  | -2.04143500 | 0.00012400  | O  | 0.31797000  | -2.19378300 | 0.00028800  |
| H  | 1.70688000  | 2.23548500  | 0.00084800  | H  | 1.45302900  | 2.12516400  | -0.00007200 |
| H  | -1.23338200 | 2.08836500  | 0.00105300  | H  | -1.47619000 | 1.88439100  | -0.00061500 |
| H  | -2.22547500 | -2.80168700 | -0.00004000 | H  | -2.29505300 | -3.05729800 | 0.00010800  |
| H  | 3.11924100  | -2.56232500 | -0.00033700 | H  | 3.03630700  | -2.61978000 | 0.00021300  |
| Cl | 4.52208900  | 2.14541000  | -0.00008900 | Cl | 4.27088300  | 2.13440100  | -0.00020100 |
| Cl | 5.43905700  | -0.92743400 | -0.00052800 | Cl | 5.29650000  | -0.90338300 | -0.00005900 |
| Cl | -5.46311400 | 1.62170400  | -0.00013300 | Cl | -3.94172200 | 2.92275800  | 0.00027700  |
| Cl | -4.66209800 | -1.48941200 | -0.00004600 | Cl | -4.79716100 | -1.75666000 | -0.00031900 |
| C  | -3.74152400 | 1.66921600  | -0.00098800 | C  | -4.09536900 | 1.20097000  | -0.00012400 |
| H  | -3.36731200 | 2.68239700  | -0.00093100 | H  | -5.11543200 | 0.85650000  | 0.00013300  |
|    |             | P11         |             |    |             | P12         |             |
| C  | -2.89801300 | 1.00305800  | 0.00006100  | C  | -3.03945300 | 0.60767000  | 0.00013600  |
| C  | -1.54875600 | 1.36412700  | 0.00013000  | C  | -1.68616500 | 1.10520400  | -0.00014900 |
| C  | -0.58991300 | 0.34488100  | 0.00010100  | C  | -0.65734700 | 0.10413200  | -0.00038800 |
| C  | -1.00326400 | -0.98458200 | 0.00008600  | C  | -1.00509300 | -1.24845600 | -0.00024900 |
| C  | -2.35482500 | -1.41464700 | 0.00001400  | C  | -2.30662800 | -1.72083600 | -0.00005100 |
| C  | -3.30405500 | -0.33544000 | -0.00001800 | C  | -3.32295700 | -0.75797000 | 0.00010000  |
| C  | 1.18762000  | -1.06419600 | 0.00015900  | C  | 1.18151400  | -1.22922000 | -0.00007800 |
| C  | 0.85990400  | 0.29987300  | 0.00020800  | C  | 0.79117900  | 0.12424400  | -0.00007900 |
| C  | 2.48692400  | -1.53402300 | 0.00006900  | C  | 2.49661200  | -1.65090000 | 0.00001500  |
| C  | 1.88660600  | 1.24245600  | 0.00010300  | C  | 1.79649100  | 1.09740700  | -0.00002600 |
| C  | 3.50334200  | -0.57947800 | 0.00000500  | C  | 3.48027900  | -0.66389200 | 0.00006000  |
| C  | 3.20507100  | 0.79752500  | 0.00001600  | C  | 3.12925200  | 0.69968900  | 0.00003700  |
| O  | 0.06034000  | -1.85030800 | 0.00012600  | O  | 0.09774600  | -2.06542400 | -0.00017300 |
| H  | 1.68331900  | 2.30528000  | 0.00011100  | H  | 1.57560000  | 2.15425400  | 0.00010600  |
| H  | -1.27374700 | 2.40987200  | 0.00022900  | H  | -2.17708000 | 3.20948500  | 0.00019500  |
| H  | -1.90289600 | -3.51395800 | 0.00005400  | H  | -2.53365500 | -2.77723900 | -0.00005700 |
| H  | 2.71514400  | -2.59090700 | 0.00002100  | H  | 2.75797900  | -2.70008500 | 0.00004000  |
| Cl | 4.48240500  | 1.99213600  | -0.00011300 | Cl | 4.36085300  | 1.94190900  | 0.00009700  |
| Cl | 5.15579700  | -1.14167000 | -0.00010300 | Cl | 5.15087000  | -1.16601100 | 0.00013000  |
| Cl | -4.07643000 | 2.29800500  | -0.00001400 | Cl | -4.35412800 | 1.75539400  | 0.00023000  |
| Cl | -5.00026600 | -0.73258100 | -0.00016100 | Cl | -4.96978000 | -1.34167100 | 0.00008600  |

|    |             |             |             |    |             |             |             |
|----|-------------|-------------|-------------|----|-------------|-------------|-------------|
| C  | -2.68655000 | -2.76963700 | -0.00002800 | C  | -1.39487600 | 2.46593000  | -0.00043800 |
| H  | -3.71467800 | -3.09746500 | -0.00020700 | H  | -0.37450300 | 2.81541500  | -0.00146700 |
|    |             | P13         |             |    |             | TS1         |             |
| C  | -2.91417500 | 0.87270400  | 0.00006700  | C  | -3.08925900 | 0.75265200  | 0.19719000  |
| C  | -1.52112100 | 0.93511000  | 0.00013600  | C  | -1.58762200 | 1.24019900  | 0.32760600  |
| C  | -0.74220000 | -0.21656300 | 0.00038200  | C  | -0.57014000 | 0.17674400  | 0.21755100  |
| C  | -1.39075700 | -1.49453700 | 0.00059700  | C  | -0.95360800 | -1.13131900 | 0.12865600  |
| C  | -2.81143100 | -1.54284000 | 0.00027400  | C  | -2.29913100 | -1.60843700 | 0.06792000  |
| C  | -3.55579200 | -0.38309500 | -0.00009300 | C  | -3.31347200 | -0.71498000 | 0.06912300  |
| C  | 1.39844800  | -1.45202600 | 0.00012100  | C  | 1.22760600  | -1.17483600 | -0.00028800 |
| C  | 0.72262500  | -0.21874400 | 0.00015000  | C  | 0.86276600  | 0.18144900  | 0.11256100  |
| C  | 2.78587800  | -1.53033100 | 0.00011200  | C  | 2.53721700  | -1.60507500 | -0.09974200 |
| C  | 1.51311400  | 0.93816700  | 0.00007500  | C  | 1.86962400  | 1.15183400  | 0.12283300  |
| C  | 3.54385400  | -0.36633200 | 0.00002900  | C  | 3.52680000  | -0.62399900 | -0.09342000 |
| C  | 2.90037100  | 0.87839300  | -0.00007300 | C  | 3.19307600  | 0.74260300  | 0.01568200  |
| O  | 0.73344100  | -2.65011200 | 0.00023100  | O  | 0.12151100  | -1.98027400 | 0.01029200  |
| H  | 1.04829300  | 1.91435200  | 0.00004000  | H  | 1.64257600  | 2.20587900  | 0.21337600  |
| H  | -1.06166400 | 1.91428900  | -0.00002900 | H  | -1.35918800 | 2.17728400  | -0.18247400 |
| H  | -3.31753800 | -2.49978800 | 0.00012100  | H  | -2.49293400 | -2.67150700 | 0.01310200  |
| H  | 3.26373200  | -2.50064900 | 0.00015800  | H  | 2.79174400  | -2.65270800 | -0.18333200 |
| Cl | 3.80643900  | 2.37136900  | -0.00035400 | Cl | 4.44122400  | 1.96928200  | 0.02562100  |
| Cl | 5.28157800  | -0.49786900 | -0.00019200 | Cl | 5.19163900  | -1.13572100 | -0.22425400 |
| Cl | -3.82231500 | 2.36164000  | 0.00065800  | Cl | -4.18729000 | 1.79629200  | -0.80984000 |
| Cl | -5.29854600 | -0.50150400 | -0.00101500 | Cl | -4.96362900 | -1.27691900 | -0.00489600 |
| C  | -0.63081300 | -2.65945300 | 0.00029800  | C  | -2.56349300 | 1.30762600  | 1.41211100  |
| H  | -1.03001900 | -3.66183400 | 0.00075100  | H  | -2.78950400 | 1.61659500  | 2.41757200  |
|    |             | TS2         |             |    |             | TS3         |             |
| C  | -3.20345700 | 0.72419000  | 0.28039700  | C  | -3.27163600 | 0.70935600  | 0.31490600  |
| C  | -1.49169800 | 1.29197100  | 0.52905400  | C  | -1.50311300 | 1.31964700  | 0.56037700  |
| C  | -0.55741300 | 0.20972400  | 0.39479800  | C  | -0.54561800 | 0.26673600  | 0.43757100  |
| C  | -0.94748200 | -1.11368200 | 0.39330700  | C  | -0.95601500 | -1.06115900 | 0.46029800  |
| C  | -2.26421700 | -1.58929000 | 0.23007600  | C  | -2.26478400 | -1.54823600 | 0.25787500  |
| C  | -3.29792100 | -0.71438500 | 0.06544500  | C  | -3.32773700 | -0.70013200 | 0.04512000  |
| C  | 1.23207300  | -1.15997400 | 0.16207000  | C  | 1.22482200  | -1.12900300 | 0.20451300  |
| C  | 0.87212900  | 0.19904100  | 0.19280300  | C  | 0.87971100  | 0.23379900  | 0.20721900  |
| C  | 2.53709600  | -1.59709100 | 0.03255600  | C  | 2.52393600  | -1.58234100 | 0.07038700  |
| C  | 1.87419200  | 1.16619500  | 0.08697100  | C  | 1.88956000  | 1.18793000  | 0.06822400  |
| C  | 3.52347000  | -0.61955900 | -0.08508400 | C  | 3.51850700  | -0.61798000 | -0.08285300 |
| C  | 3.19263200  | 0.75078500  | -0.06041900 | C  | 3.20209900  | 0.75585900  | -0.08650400 |
| O  | 0.13255400  | -1.96405800 | 0.28437900  | O  | 0.12023800  | -1.92057800 | 0.35902600  |
| H  | 1.65034400  | 2.22440800  | 0.11837200  | H  | 1.67555900  | 2.24855300  | 0.08038000  |
| H  | -1.21090700 | 2.24844700  | 0.08737200  | H  | -1.35343800 | 2.26683300  | 0.04855600  |
| H  | -2.43202500 | -2.65144100 | 0.11131100  | H  | -2.39587900 | -2.61158200 | 0.10509600  |
| H  | 2.78972300  | -2.64834500 | 0.01553800  | H  | 2.76580700  | -2.63624600 | 0.07499000  |

|    |             |             |             |    |             |             |             |
|----|-------------|-------------|-------------|----|-------------|-------------|-------------|
| Cl | 4.43460600  | 1.97502100  | -0.20434800 | Cl | 4.45443800  | 1.96328000  | -0.27302700 |
| Cl | 5.18050100  | -1.14173700 | -0.26296200 | Cl | 5.16749700  | -1.16160700 | -0.26916200 |
| Cl | -4.29833900 | 1.77816400  | -0.66031600 | Cl | -4.33803200 | 1.82904200  | -0.55378700 |
| Cl | -4.84670300 | -1.36176300 | -0.44023300 | Cl | -4.79610100 | -1.37790700 | -0.63128300 |
| C  | -2.61211100 | 1.30757600  | 1.45304000  | C  | -2.59723500 | 1.18355400  | 1.49618000  |
| H  | -2.99243000 | 2.16174800  | 1.99589000  | H  | -2.58157900 | 0.69117700  | 2.46228500  |
|    |             | TS4         |             |    |             | TS5         |             |
| C  | -3.09547900 | 0.75131600  | -0.07965500 | C  | -2.95350800 | 0.54470700  | -0.26862000 |
| C  | -1.83294700 | 1.35559400  | 0.31413700  | C  | -1.63254800 | 0.98475300  | -0.30441100 |
| C  | -0.59211200 | 0.21071500  | 0.71469500  | C  | -0.61205900 | 0.04815000  | -0.14268800 |
| C  | -1.03701500 | -1.15754100 | 0.48175000  | C  | -0.94689400 | -1.30251900 | 0.04090200  |
| C  | -2.32185500 | -1.55695600 | 0.32514000  | C  | -2.24998300 | -1.76368800 | 0.07551800  |
| C  | -3.35049300 | -0.58274200 | 0.08516100  | C  | -3.26117400 | -0.81690100 | -0.08199200 |
| C  | 1.15115200  | -1.16217300 | 0.14120700  | C  | 1.24418500  | -1.23551200 | 0.08380300  |
| C  | 0.84556700  | 0.18134700  | 0.37755400  | C  | 0.83570500  | 0.09323200  | -0.11175700 |
| C  | 2.42913600  | -1.59886800 | -0.14907000 | C  | 2.56979000  | -1.61611600 | 0.16935400  |
| C  | 1.85527200  | 1.13146700  | 0.34136700  | C  | 1.80259800  | 1.09117100  | -0.22272300 |
| C  | 3.43668800  | -0.63311400 | -0.20413900 | C  | 3.52550500  | -0.60760900 | 0.05308500  |
| C  | 3.15459900  | 0.72086100  | 0.03938700  | C  | 3.14488800  | 0.73541200  | -0.14080300 |
| O  | 0.04972100  | -1.97935600 | 0.24331200  | O  | 0.17006500  | -2.08884300 | 0.17782500  |
| H  | 1.65836200  | 2.17725700  | 0.53890800  | H  | 1.53280400  | 2.12902600  | -0.36701100 |
| H  | -1.49986100 | 2.23036900  | -0.23920500 | H  | -1.42093300 | 2.03398500  | -0.45926500 |
| H  | -2.55952800 | -2.60308600 | 0.18842600  | H  | -2.48345700 | -2.80973700 | 0.21828200  |
| H  | 2.64826600  | -2.64195800 | -0.33105400 | H  | 2.86196500  | -2.64610600 | 0.31996400  |
| Cl | 4.41425300  | 1.93186500  | -0.01871500 | Cl | 4.34716300  | 1.99659700  | -0.28390100 |
| Cl | 5.05629900  | -1.16169200 | -0.58342500 | Cl | 5.20808600  | -1.05851200 | 0.15600000  |
| Cl | -4.23325500 | 1.83250800  | -0.85529200 | Cl | -4.22505500 | 1.73636200  | -0.46042800 |
| Cl | -4.94382300 | -1.23632700 | -0.23644900 | Cl | -4.91669600 | -1.36728900 | -0.04134100 |
| C  | -1.28563600 | 1.09844300  | 1.63195800  | C  | -2.40984000 | 2.77617800  | 2.02207800  |
| H  | -1.77532800 | 0.89415200  | 2.57543300  | H  | -3.22035200 | 2.19435200  | 2.53934400  |
|    |             | TS6         |             |    |             | TS7         |             |
| C  | -2.86950700 | 0.85230500  | 0.02244900  | C  | -2.91630900 | 0.83010700  | 0.07403000  |
| C  | -1.64670400 | 1.22144100  | 0.45045200  | C  | -1.63709500 | 1.23562200  | 0.35707400  |
| C  | -0.69116100 | 0.21205800  | 0.94128900  | C  | -0.67491800 | 0.34587800  | 0.91999700  |
| C  | -1.11703600 | -1.30875800 | 0.77332600  | C  | -1.14294400 | -1.41564000 | 0.71683300  |
| C  | -2.41032900 | -1.57514700 | 0.13951600  | C  | -2.36411400 | -1.57929400 | 0.00919700  |
| C  | -3.25293200 | -0.55878700 | -0.13496100 | C  | -3.26903300 | -0.55339100 | -0.10039100 |
| C  | 1.05949200  | -1.17711200 | 0.19188400  | C  | 1.06056600  | -1.14714600 | 0.23039000  |
| C  | 0.75221300  | 0.14837900  | 0.53677800  | C  | 0.74646700  | 0.19981600  | 0.51748900  |
| C  | 2.32975700  | -1.55126100 | -0.20825400 | C  | 2.33752700  | -1.53557700 | -0.13341900 |
| C  | 1.73284900  | 1.12336500  | 0.45976200  | C  | 1.74501700  | 1.16051900  | 0.39968000  |
| C  | 3.31300900  | -0.56088000 | -0.28018300 | C  | 3.32829000  | -0.55844700 | -0.23729300 |
| C  | 3.02021100  | 0.76888600  | 0.04627400  | C  | 3.03402100  | 0.78700800  | 0.02113600  |
| O  | 0.00317900  | -2.04744700 | 0.25920600  | O  | 0.02216600  | -2.05767800 | 0.25900500  |

|    |             |             |             |    |             |             |             |
|----|-------------|-------------|-------------|----|-------------|-------------|-------------|
| H  | 1.52646900  | 2.15410600  | 0.71837600  | H  | 1.53910500  | 2.20098800  | 0.61552800  |
| H  | -1.34530200 | 2.26079100  | 0.39927000  | H  | -1.32209200 | 2.22693400  | 0.05028200  |
| H  | -2.67076100 | -2.59741900 | -0.10565100 | H  | -2.54846600 | -2.52334500 | -0.49004000 |
| H  | 2.55718100  | -2.57518100 | -0.47106100 | H  | 2.55918600  | -2.57115000 | -0.35232600 |
| Cl | 4.24048000  | 2.01894700  | -0.03776700 | Cl | 4.25957500  | 2.02681500  | -0.10025300 |
| Cl | 4.91330400  | -1.03284700 | -0.79613500 | Cl | 4.93164500  | -1.06017100 | -0.70747000 |
| Cl | -3.99746300 | 2.09659200  | -0.47798700 | Cl | -4.07042200 | 2.07243100  | -0.38474100 |
| Cl | -4.83016300 | -0.93764000 | -0.79211000 | Cl | -4.85072100 | -0.95702000 | -0.74475700 |
| C  | -0.99486100 | -0.68395500 | 2.06471700  | C  | -1.01202000 | -0.66104200 | 1.93235200  |
| H  | -0.98773200 | -0.79181900 | 3.13511700  | H  | -0.40909900 | -0.91743500 | 2.79483800  |
|    |             | TS8         |             |    |             | TS9         |             |
| C  | -2.88513500 | 0.83851400  | 0.05402600  | C  | -2.94020400 | 0.80168200  | 0.02341800  |
| C  | -1.62948400 | 1.24393000  | 0.38564000  | C  | -1.59912200 | 1.29371100  | 0.14160200  |
| C  | -0.67213200 | 0.29091200  | 0.90881500  | C  | -0.64986300 | 0.56638400  | 0.80889100  |
| C  | -1.11853100 | -1.37770500 | 0.72187800  | C  | -1.18576800 | -1.52551400 | 0.62641000  |
| C  | -2.36756400 | -1.59686700 | 0.04359400  | C  | -2.31274400 | -1.61923000 | -0.13390200 |
| C  | -3.24704500 | -0.56754300 | -0.11765300 | C  | -3.26755100 | -0.54974200 | -0.10889600 |
| C  | 1.07819600  | -1.16443100 | 0.21627000  | C  | 1.05076900  | -1.08703500 | 0.24128600  |
| C  | 0.75426000  | 0.16990500  | 0.50044200  | C  | 0.75995200  | 0.29135200  | 0.44162800  |
| C  | 2.36031400  | -1.55246000 | -0.13045300 | C  | 2.33972100  | -1.50844100 | -0.04668000 |
| C  | 1.73660200  | 1.14355600  | 0.39299300  | C  | 1.79850000  | 1.21066200  | 0.30881900  |
| C  | 3.34170900  | -0.56523300 | -0.22714800 | C  | 3.36136300  | -0.56969700 | -0.16580600 |
| C  | 3.03290600  | 0.77776800  | 0.02523600  | C  | 3.09125600  | 0.79370700  | 0.00398900  |
| O  | 0.02497300  | -2.04391700 | 0.25124700  | O  | 0.04637200  | -2.04629900 | 0.23584600  |
| H  | 1.52192900  | 2.18298900  | 0.60500400  | H  | 1.60767400  | 2.26421900  | 0.46721900  |
| H  | -1.33083300 | 2.26811000  | 0.19550400  | H  | -1.33463800 | 2.15353200  | -0.46601000 |
| H  | -2.59075300 | -2.57862400 | -0.35594000 | H  | -2.43240200 | -2.39932500 | -0.87748200 |
| H  | 2.59338500  | -2.58707700 | -0.34140700 | H  | 2.54091800  | -2.56042600 | -0.19776400 |
| Cl | 4.24755700  | 2.02952000  | -0.09344900 | Cl | 4.34867800  | 1.99839000  | -0.13690600 |
| Cl | 4.95505100  | -1.05231600 | -0.68382400 | Cl | 4.96799700  | -1.13810500 | -0.53958400 |
| Cl | -4.04464500 | 2.06975600  | -0.41239100 | Cl | -4.16070500 | 2.02835800  | -0.28974400 |
| Cl | -4.82922700 | -0.95468300 | -0.76155400 | Cl | -4.89763400 | -1.00153700 | -0.58592300 |
| C  | -1.06433800 | -0.64082400 | 1.96325200  | C  | -1.11642100 | -0.52306800 | 1.66482300  |
| H  | -1.90056100 | -0.49989800 | 2.63622300  | H  | -1.12357000 | -0.61702800 | 2.74044800  |
|    |             | TS10        |             |    |             | TS11        |             |
| C  | -2.98875500 | 0.82941100  | -0.09776600 | C  | -2.93396700 | 0.85133800  | 0.12040500  |
| C  | -1.66297200 | 1.21879600  | 0.00652600  | C  | -1.55886800 | 1.15334700  | 0.41459700  |
| C  | -0.67177200 | 0.23298200  | 0.04542900  | C  | -0.63190100 | 0.16725100  | 0.51939200  |
| C  | -1.05022700 | -1.12286500 | -0.03559000 | C  | -1.01409500 | -1.25772400 | 0.57431200  |
| C  | -2.37623100 | -1.53130400 | -0.14711800 | C  | -2.53510500 | -1.60234900 | 0.11277500  |
| C  | -3.34565300 | -0.53797400 | -0.17122800 | C  | -3.36555200 | -0.41222900 | -0.14724400 |
| C  | 1.14276600  | -1.12290100 | -0.11686800 | C  | 1.17713000  | -1.17176900 | 0.12141900  |
| C  | 0.77767400  | 0.22682000  | 0.00666300  | C  | 0.81042800  | 0.16265500  | 0.35809300  |
| C  | 2.45523800  | -1.54820000 | -0.18649500 | C  | 2.47777400  | -1.54464800 | -0.16668600 |

|    |             |             |             |    |             |             |             |
|----|-------------|-------------|-------------|----|-------------|-------------|-------------|
| C  | 1.77424800  | 1.19905600  | 0.05537800  | C  | 1.78286700  | 1.15824700  | 0.31136400  |
| C  | 3.44223900  | -0.56397600 | -0.13768400 | C  | 3.44494100  | -0.53840200 | -0.19749800 |
| C  | 3.10468900  | 0.79903400  | -0.01842700 | C  | 3.10240500  | 0.80395200  | 0.04252800  |
| O  | 0.04320300  | -1.94878400 | -0.15217800 | O  | 0.12421600  | -2.03881500 | 0.19099600  |
| H  | 1.53781200  | 2.25035700  | 0.15298400  | H  | 1.53629000  | 2.19789300  | 0.48331900  |
| H  | -1.41529500 | 2.27061100  | 0.05296300  | H  | -1.26509000 | 2.19511600  | 0.40586900  |
| H  | -2.64308400 | -2.57626600 | -0.22113400 | H  | -2.71272500 | -2.45934100 | -0.53634000 |
| H  | 2.71496800  | -2.59374700 | -0.27783000 | H  | 2.74423300  | -2.57563700 | -0.35388400 |
| Cl | 4.34474800  | 2.02875100  | 0.04271400  | Cl | 4.31269000  | 2.06622100  | 0.00835700  |
| Cl | 5.10815900  | -1.07085100 | -0.22993100 | Cl | 5.09351600  | -0.99857500 | -0.53651000 |
| Cl | -4.21462800 | 2.06983400  | -0.13642800 | Cl | -3.99312300 | 2.23299400  | -0.08103700 |
| Cl | -5.01407400 | -1.02254000 | -0.29372000 | Cl | -4.92352600 | -0.73952400 | -0.86146000 |
| C  | -1.26226300 | -0.80259200 | 2.39792700  | C  | -1.99040800 | -1.83660100 | 1.44287200  |
| H  | -0.38540200 | -1.50670200 | 2.40118500  | H  | -2.21279500 | -2.18489600 | 2.43614100  |
|    |             | TS12        |             |    |             | TS13        |             |
| C  | -2.90015800 | 0.90183800  | 0.12005600  | C  | -2.87589500 | 0.89378000  | 0.14298300  |
| C  | -1.59041300 | 1.21673700  | 0.18418100  | C  | -1.55761200 | 1.16110400  | 0.34178200  |
| C  | -0.58315100 | 0.18266300  | 0.21535800  | C  | -0.58063100 | 0.12748600  | 0.40876100  |
| C  | -0.93196900 | -1.13611400 | 0.24720500  | C  | -0.93131600 | -1.20303000 | 0.33491200  |
| C  | -2.30357000 | -1.64276300 | 0.28370900  | C  | -2.23953900 | -1.76300100 | 0.40770500  |
| C  | -3.39686800 | -0.50435800 | 0.14911700  | C  | -3.47698800 | -0.43725600 | 0.21141700  |
| C  | 1.24546800  | -1.15027500 | 0.08308400  | C  | 1.24210500  | -1.17676600 | 0.04684700  |
| C  | 0.86090200  | 0.20067300  | 0.12373600  | C  | 0.86072100  | 0.15762300  | 0.25664000  |
| C  | 2.55816700  | -1.57066000 | -0.00935700 | C  | 2.55010800  | -1.57461300 | -0.15447600 |
| C  | 1.85143700  | 1.18230400  | 0.06202300  | C  | 1.84397000  | 1.14723600  | 0.25414600  |
| C  | 3.53443200  | -0.57785200 | -0.06740400 | C  | 3.52114500  | -0.57471200 | -0.14946100 |
| C  | 3.18151900  | 0.78643500  | -0.03197400 | C  | 3.16921400  | 0.77466200  | 0.05323700  |
| O  | 0.14512200  | -1.97178400 | 0.15093900  | O  | 0.15209400  | -2.00995100 | 0.07435400  |
| H  | 1.61107000  | 2.23700700  | 0.08692300  | H  | 1.60280700  | 2.19059100  | 0.40954000  |
| H  | -1.29530000 | 2.25818600  | 0.20810000  | H  | -1.23665100 | 2.19516700  | 0.33475500  |
| H  | -2.48461300 | -2.56527000 | -0.26943800 | H  | -2.38558100 | -2.71874900 | -0.09512400 |
| H  | 2.82544600  | -2.61804400 | -0.03776200 | H  | 2.81735200  | -2.61044500 | -0.31191000 |
| Cl | 4.41005100  | 2.03022800  | -0.10695800 | Cl | 4.39034000  | 2.02783800  | 0.05835700  |
| Cl | 5.20531300  | -1.07432700 | -0.18582500 | Cl | 5.18474000  | -1.04411000 | -0.40145100 |
| Cl | -4.10681700 | 2.16875400  | 0.09443900  | Cl | -3.95539900 | 2.23720600  | -0.20320800 |
| Cl | -4.79034100 | -0.86603800 | -0.96034600 | Cl | -4.88172600 | -0.76803900 | -0.84077400 |
| C  | -3.25608800 | -1.29157500 | 1.33816800  | C  | -3.28014700 | -1.32024600 | 1.32349200  |
| H  | -3.64532300 | -1.51641200 | 2.31497100  | H  | -4.03070700 | -1.94975700 | 1.78030700  |
|    |             | TS14        |             |    |             | TS15        |             |
| C  | -2.88950800 | 0.89496500  | 0.12783300  | C  | -2.85061900 | 0.97697600  | -0.11173500 |
| C  | -1.55659900 | 1.11614300  | 0.36545200  | C  | -1.50712300 | 1.32520800  | -0.01997500 |
| C  | -0.59591300 | 0.06877000  | 0.45159400  | C  | -0.54410700 | 0.32035500  | -0.10633100 |
| C  | -0.93241100 | -1.27255900 | 0.32428800  | C  | -0.95740700 | -1.00939800 | -0.28360400 |
| C  | -2.24491600 | -1.79974900 | 0.39218600  | C  | -2.28485100 | -1.38518600 | -0.37788900 |

|    |             |             |             |    |             |             |             |
|----|-------------|-------------|-------------|----|-------------|-------------|-------------|
| C  | -3.50900200 | -0.39966000 | 0.24846100  | C  | -3.23482600 | -0.36698100 | -0.28739100 |
| C  | 1.23794900  | -1.20254700 | 0.01143600  | C  | 1.23136600  | -1.08784700 | -0.21243100 |
| C  | 0.84581100  | 0.11587000  | 0.28956900  | C  | 0.90373400  | 0.26869300  | -0.05875300 |
| C  | 2.54748500  | -1.57573300 | -0.22393100 | C  | 2.53139100  | -1.55698300 | -0.22084100 |
| C  | 1.81882800  | 1.11474000  | 0.32236600  | C  | 1.92891700  | 1.20080800  | 0.09377700  |
| C  | 3.50872500  | -0.56705800 | -0.18166700 | C  | 3.54562200  | -0.61299700 | -0.06687600 |
| C  | 3.14572800  | 0.76709300  | 0.08925400  | C  | 3.24670900  | 0.75543800  | 0.08906200  |
| O  | 0.15833400  | -2.04986000 | 0.00977100  | O  | 0.11018800  | -1.86905300 | -0.35043400 |
| H  | 1.56879800  | 2.14679400  | 0.53067200  | H  | 1.72406200  | 2.25637400  | 0.21543600  |
| H  | -1.20075000 | 2.13848000  | 0.32742300  | H  | -1.23440200 | 2.36353100  | 0.11605000  |
| H  | -2.50736600 | -2.68787400 | -0.17680300 | H  | -2.58008800 | -2.41585400 | -0.51381900 |
| H  | 2.82302700  | -2.59984100 | -0.43474500 | H  | 2.76030600  | -2.60695200 | -0.33988800 |
| Cl | 4.35374100  | 2.03160300  | 0.14205800  | Cl | 4.52159700  | 1.93641800  | 0.28235000  |
| Cl | 5.17354400  | -1.00622800 | -0.47465500 | Cl | 5.19701200  | -1.17606000 | -0.07234100 |
| Cl | -3.87950400 | 2.25298400  | -0.38590300 | Cl | -4.04789300 | 2.24652600  | -0.00060600 |
| Cl | -4.95222600 | -0.79191500 | -0.70299100 | Cl | -4.92327300 | -0.81343200 | -0.39743800 |
| C  | -3.17414400 | -1.24725800 | 1.35933500  | C  | -3.70330500 | -2.26663400 | 2.21021900  |
| H  | -2.98700600 | -0.94632600 | 2.38357000  | H  | -4.09091800 | -1.30206000 | 2.63890400  |
|    |             | TS16        |             |    |             | TS17        |             |
| C  | -2.89957400 | 0.81747800  | -0.11168800 | C  | 3.14450600  | 0.67427200  | -0.09410500 |
| C  | -1.56216000 | 1.20386900  | -0.08843100 | C  | 1.78159300  | 1.14448500  | -0.42656400 |
| C  | -0.57860000 | 0.21912900  | -0.09782800 | C  | 0.87028700  | 0.19408100  | -1.03190000 |
| C  | -0.95683600 | -1.13476800 | -0.12081300 | C  | 1.11095100  | -1.11431200 | -0.48029900 |
| C  | -2.26967500 | -1.55104000 | -0.14362500 | C  | 2.35703800  | -1.59927300 | -0.20223400 |
| C  | -3.25848800 | -0.55344200 | -0.14473000 | C  | 3.42555700  | -0.65671700 | -0.07666600 |
| C  | 1.23257700  | -1.14593800 | -0.07760900 | C  | -1.03187600 | -0.97725300 | 0.04741300  |
| C  | 0.86902700  | 0.21005700  | -0.06790200 | C  | -0.74096400 | 0.44170100  | 0.09560500  |
| C  | 2.54582000  | -1.57720500 | -0.05978800 | C  | -2.30549100 | -1.50733800 | 0.08836100  |
| C  | 1.86853500  | 1.18168400  | -0.03592900 | C  | -1.93255800 | 1.24884200  | -0.02329600 |
| C  | 3.53353800  | -0.59440800 | -0.02821800 | C  | -3.41133500 | -0.66619100 | 0.11165200  |
| C  | 3.19787300  | 0.77527700  | -0.01613400 | C  | -3.20411400 | 0.72925900  | 0.02143200  |
| O  | 0.13357700  | -1.96788600 | -0.10739400 | O  | 0.00781300  | -1.83512700 | -0.15221300 |
| H  | 1.63386800  | 2.23793100  | -0.02454600 | H  | -1.82074200 | 2.32317400  | -0.07651500 |
| H  | -1.31451700 | 2.25647700  | -0.05947800 | H  | 1.83036000  | 2.14131400  | -0.86060700 |
| H  | -2.54259300 | -2.59661000 | -0.16748900 | H  | 2.51337700  | -2.63893200 | 0.05357100  |
| H  | 2.80399500  | -2.62707400 | -0.06690200 | H  | -2.42817000 | -2.58170200 | 0.05748100  |
| Cl | 4.44091400  | 2.00354900  | 0.02449900  | Cl | -4.56101300 | 1.82725700  | -0.03764500 |
| Cl | 5.19968500  | -1.10870500 | -0.00248000 | Cl | -5.00237300 | -1.35744500 | 0.18531200  |
| Cl | -4.12216700 | 2.05946800  | -0.14905800 | Cl | 4.33723100  | 1.89443100  | 0.20460600  |
| Cl | -4.91536900 | -1.04776900 | -0.39943700 | Cl | 5.01708100  | -1.27755400 | 0.25003000  |
| C  | -3.01939900 | -0.46763100 | 2.30261900  | C  | 0.47522100  | 1.20868000  | 0.54253900  |
| H  | -4.11727800 | -0.23725800 | 2.26812400  | H  | 0.16402800  | 2.24203800  | 0.37299700  |
|    |             | TS18        |             |    |             | TS19        |             |
| C  | -2.82876300 | 0.88958400  | -0.08142400 | C  | -2.82733800 | 0.87168500  | -0.06927000 |

|    |             |             |             |    |             |             |             |
|----|-------------|-------------|-------------|----|-------------|-------------|-------------|
| C  | -1.49451000 | 1.25037300  | -0.04746500 | C  | -1.49207000 | 1.24065800  | -0.03574500 |
| C  | -0.51437500 | 0.25046300  | -0.03736600 | C  | -0.51181900 | 0.24510400  | -0.03121400 |
| C  | -0.91232700 | -1.09714000 | -0.08501200 | C  | -0.90961300 | -1.10711600 | -0.07322700 |
| C  | -2.22987500 | -1.49928200 | -0.13097900 | C  | -2.22114300 | -1.51324600 | -0.10258000 |
| C  | -3.19919700 | -0.48407100 | -0.03953600 | C  | -3.19777500 | -0.50016700 | -0.02118300 |
| C  | 1.28086100  | -1.13638300 | -0.06064700 | C  | 1.28481600  | -1.13934800 | -0.05041100 |
| C  | 0.93092300  | 0.22436000  | -0.01995900 | C  | 0.93313700  | 0.22124400  | -0.01540400 |
| C  | 2.58731900  | -1.58350700 | -0.05884200 | C  | 2.59228200  | -1.58360900 | -0.05040600 |
| C  | 1.94456500  | 1.18160900  | 0.02564700  | C  | 1.94500300  | 1.18060000  | 0.02410600  |
| C  | 3.58941600  | -0.61363400 | -0.01283700 | C  | 3.59276700  | -0.61160400 | -0.01125000 |
| C  | 3.26962400  | 0.75757400  | 0.02908200  | C  | 3.27088900  | 0.75924100  | 0.02550200  |
| O  | 0.16982900  | -1.94475800 | -0.10110100 | O  | 0.17651500  | -1.95055300 | -0.08476600 |
| H  | 1.72448800  | 2.24050200  | 0.05955900  | H  | 1.72312800  | 2.23927100  | 0.05375700  |
| H  | -1.23112600 | 2.30002300  | -0.03386800 | H  | -1.23264700 | 2.29131000  | -0.02660500 |
| H  | -2.51309000 | -2.54044400 | -0.19433600 | H  | -2.50675600 | -2.55509900 | -0.11842000 |
| H  | 2.83246800  | -2.63610500 | -0.09072100 | H  | 2.83915200  | -2.63591300 | -0.07798000 |
| Cl | 4.52753200  | 1.97126900  | 0.08728200  | Cl | 4.52670700  | 1.97547000  | 0.07545000  |
| Cl | 5.24978400  | -1.15069300 | -0.00851100 | Cl | 5.25389000  | -1.14550800 | -0.00910400 |
| Cl | -4.04367900 | 2.13502900  | -0.09969500 | Cl | -4.04098900 | 2.13035900  | -0.11310900 |
| Cl | -4.88103300 | -0.96117200 | -0.44148200 | Cl | -4.87610400 | -0.97016700 | -0.45880400 |
| C  | -4.48466500 | -0.77850400 | 1.70734200  | C  | -4.46423400 | -0.99672200 | 1.68353200  |
| H  | -4.29964200 | -1.87992600 | 1.80105600  | H  | -4.88395500 | 0.03191000  | 1.80732100  |
|    |             | TS20        |             |    |             | TS21        |             |
| C  | -2.71879800 | 0.91357900  | 0.23886400  | C  | -2.89402100 | 0.84177900  | 0.18810000  |
| C  | -1.38414800 | 1.28173400  | 0.13133500  | C  | -1.54866200 | 1.21830300  | 0.10149500  |
| C  | -0.41985900 | 0.27329000  | 0.15122100  | C  | -0.57506700 | 0.23412800  | 0.09278100  |
| C  | -0.82966100 | -1.06306500 | 0.28145800  | C  | -0.96892000 | -1.13555800 | 0.19529100  |
| C  | -2.15491600 | -1.43984900 | 0.38730800  | C  | -2.25230300 | -1.56044800 | 0.29138900  |
| C  | -3.13124600 | -0.43294700 | 0.36768300  | C  | -3.35254500 | -0.56943700 | 0.25884100  |
| C  | 1.35918100  | -1.13595800 | 0.15652500  | C  | 1.23121400  | -1.13950300 | 0.11544700  |
| C  | 1.02652000  | 0.22546300  | 0.06855100  | C  | 0.86646000  | 0.21645300  | 0.04451300  |
| C  | 2.66058500  | -1.60076200 | 0.11510700  | C  | 2.54208700  | -1.57039500 | 0.08814000  |
| C  | 2.04660900  | 1.16594900  | -0.06711100 | C  | 1.86627700  | 1.18455400  | -0.05525500 |
| C  | 3.66930500  | -0.64834400 | -0.02105200 | C  | 3.53126200  | -0.58984600 | -0.01201200 |
| C  | 3.36487700  | 0.72475800  | -0.11170500 | C  | 3.19581000  | 0.77704900  | -0.08260700 |
| O  | 0.24392100  | -1.92467500 | 0.28576200  | O  | 0.13523600  | -1.96176300 | 0.21349600  |
| H  | 1.83661400  | 2.22507300  | -0.13893000 | H  | 1.63091200  | 2.23912800  | -0.11294200 |
| H  | -1.11471800 | 2.32563900  | 0.03788800  | H  | -1.30132400 | 2.27003000  | 0.03893500  |
| H  | -2.43979200 | -2.47976600 | 0.48102900  | H  | -2.51385000 | -2.60427500 | 0.39908600  |
| H  | 2.89473700  | -2.65405800 | 0.18439800  | H  | 2.80123100  | -2.61866200 | 0.14212100  |
| Cl | 4.63325400  | 1.91644500  | -0.28346900 | Cl | 4.43653800  | 2.00102700  | -0.20859700 |
| Cl | 5.32177400  | -1.20685000 | -0.07671900 | Cl | 5.19468600  | -1.10770700 | -0.04625200 |
| Cl | -3.93120000 | 2.18512000  | 0.23475400  | Cl | -4.10771800 | 2.08390400  | 0.05773200  |
| Cl | -5.53593500 | -1.00558300 | -0.90319200 | Cl | -4.64236100 | -1.09631700 | -1.07644200 |



|    |             |             |             |    |             |             |             |
|----|-------------|-------------|-------------|----|-------------|-------------|-------------|
| C  | -4.54788900 | -0.80244700 | 0.50062000  | C  | -3.83657900 | -0.37298000 | 1.59490700  |
| H  | -5.06573800 | -0.90313000 | 1.44332700  | H  | -3.50840800 | -0.77212700 | 2.54916700  |
|    |             | TS22        |             |    |             | TS23        |             |
| C  | -2.89268900 | 0.83376300  | 0.23944900  | C  | -2.88854100 | 0.84529800  | 0.20253800  |
| C  | -1.54796000 | 1.20902900  | 0.13623300  | C  | -1.57832400 | 1.20980000  | 0.09697900  |
| C  | -0.57855900 | 0.22361400  | 0.12320400  | C  | -0.57997000 | 0.20465100  | 0.10192500  |
| C  | -0.96652200 | -1.14877000 | 0.24419600  | C  | -0.95304500 | -1.13964800 | 0.24401700  |
| C  | -2.24309700 | -1.57013500 | 0.37654100  | C  | -2.25842700 | -1.57084400 | 0.33879400  |
| C  | -3.34742600 | -0.57754800 | 0.31348000  | C  | -3.33986700 | -0.57302500 | 0.26730500  |
| C  | 1.23188800  | -1.14403000 | 0.14712000  | C  | 1.23627600  | -1.14476400 | 0.16205300  |
| C  | 0.86223000  | 0.20959900  | 0.06148600  | C  | 0.85581900  | 0.20682600  | 0.05020400  |
| C  | 2.54541500  | -1.56919400 | 0.11531800  | C  | 2.55235900  | -1.56464900 | 0.14220000  |
| C  | 1.85652400  | 1.18147800  | -0.05855800 | C  | 1.84828600  | 1.18254600  | -0.08309800 |
| C  | 3.52826300  | -0.58578400 | -0.00557300 | C  | 3.52900800  | -0.57866100 | 0.00876700  |
| C  | 3.18685300  | 0.77996800  | -0.09159900 | C  | 3.17851200  | 0.78510800  | -0.10240100 |
| O  | 0.14279800  | -1.96930800 | 0.26346500  | O  | 0.14716200  | -1.96523900 | 0.28703200  |
| H  | 1.61527300  | 2.23402800  | -0.12777800 | H  | 1.60355100  | 2.23250900  | -0.17456400 |
| H  | -1.29855200 | 2.25890500  | 0.05325000  | H  | -1.31486200 | 2.25811600  | 0.03618600  |
| H  | -2.50745300 | -2.60670200 | 0.53212800  | H  | -2.52637100 | -2.61517100 | 0.40239400  |
| H  | 2.80971600  | -2.61544200 | 0.18144800  | H  | 2.82176300  | -2.60829300 | 0.22699800  |
| Cl | 4.42158000  | 2.00628300  | -0.24321900 | Cl | 4.40939100  | 2.01370900  | -0.27081000 |
| Cl | 5.19306600  | -1.09557700 | -0.04651100 | Cl | 5.19818000  | -1.07816000 | -0.01593900 |
| Cl | -4.09884100 | 2.07776600  | 0.04331700  | Cl | -4.12880900 | 2.05792400  | 0.29020200  |
| Cl | -4.56708000 | -1.12413500 | -1.17288100 | Cl | -4.51476600 | -0.93994000 | -1.34686700 |
| C  | -3.85722000 | -0.41919700 | 1.61377900  | C  | -3.91946700 | -0.88349500 | 1.51487200  |
| H  | -4.55589200 | 0.25319300  | 2.09076900  | H  | -4.24503000 | -0.33017100 | 2.38582000  |
|    |             | TS24        |             |    |             | TS25        |             |
| C  | -2.78487400 | 0.67504400  | -0.24656600 | C  | -2.90018800 | 0.61395700  | -0.02008600 |
| C  | -1.46309500 | 1.10452000  | -0.20123500 | C  | -1.57001900 | 1.05763200  | -0.09623800 |
| C  | -0.45145400 | 0.14893500  | -0.12359900 | C  | -0.55395600 | 0.10922100  | -0.03327400 |
| C  | -0.79715000 | -1.21187100 | -0.08890600 | C  | -0.88857400 | -1.25416800 | 0.01229700  |
| C  | -2.10262500 | -1.66401900 | -0.12690100 | C  | -2.19504000 | -1.71990400 | -0.01870400 |
| C  | -3.10165100 | -0.69598100 | -0.20884600 | C  | -3.20838900 | -0.77558800 | -0.07103600 |
| C  | 1.39306600  | -1.16663700 | 0.00465100  | C  | 1.30308400  | -1.19591200 | 0.02717900  |
| C  | 0.99665900  | 0.17846200  | -0.06100700 | C  | 0.89603800  | 0.14687700  | -0.02789800 |
| C  | 2.71458900  | -1.56432900 | 0.07541200  | C  | 2.62864300  | -1.58502100 | 0.05251900  |
| C  | 1.97255200  | 1.17361800  | -0.05447400 | C  | 1.86564900  | 1.14741900  | -0.05935800 |
| C  | 3.67924800  | -0.55757100 | 0.08060200  | C  | 3.58706000  | -0.57257500 | 0.01974600  |
| C  | 3.31104300  | 0.80095400  | 0.01639900  | C  | 3.20840000  | 0.78306700  | -0.03647300 |
| O  | 0.31314200  | -2.01646700 | -0.01157400 | O  | 0.22890900  | -2.05212000 | 0.05151700  |
| H  | 1.71414700  | 2.22329500  | -0.10291200 | H  | 1.59963200  | 2.19550700  | -0.10078100 |
| H  | -1.24449400 | 2.16397700  | -0.22652100 | H  | -1.36205700 | 2.11720800  | -0.16129500 |
| H  | -2.34594500 | -2.71694100 | -0.09368800 | H  | -2.42346700 | -2.77688500 | -0.00879100 |
| H  | 2.99714500  | -2.60676900 | 0.12524400  | H  | 2.91917200  | -2.62559300 | 0.09548600  |

|    |             |             |             |    |             |             |             |
|----|-------------|-------------|-------------|----|-------------|-------------|-------------|
| Cl | 4.52317300  | 2.06113000  | 0.02372400  | Cl | 4.41200200  | 2.05111700  | -0.07783200 |
| Cl | 5.35644100  | -1.03055200 | 0.16913900  | Cl | 5.26939500  | -1.03548300 | 0.04953800  |
| Cl | -4.04989000 | 1.87886700  | -0.34170300 | Cl | -4.16443900 | 1.81759700  | -0.47635100 |
| Cl | -4.76332800 | -1.22818100 | -0.25510000 | Cl | -4.85755800 | -1.31665200 | -0.11597100 |
| C  | -5.87364400 | 0.70931900  | 1.94153700  | C  | -3.92640600 | 1.47227200  | 1.67377400  |
| H  | -6.71069800 | 0.90400000  | 1.21503600  | H  | -3.25217100 | 2.36121600  | 1.77902500  |
|    |             | TS26        |             |    |             | TS27        |             |
| C  | -2.89531200 | 0.62315200  | -0.00319700 | C  | -2.84908700 | 0.45584600  | 0.36494800  |
| C  | -1.55890000 | 1.06154500  | -0.07472000 | C  | -1.52828300 | 0.92061800  | 0.35806800  |
| C  | -0.55030500 | 0.11295500  | -0.03183100 | C  | -0.47526400 | 0.02582800  | 0.17606300  |
| C  | -0.88562400 | -1.25467200 | 0.00996900  | C  | -0.76616400 | -1.33637100 | -0.00284800 |
| C  | -2.19012700 | -1.71628300 | -0.00807000 | C  | -2.05219500 | -1.84634700 | -0.00387900 |
| C  | -3.20181100 | -0.76385300 | -0.05608200 | C  | -3.08038500 | -0.92754400 | 0.18213900  |
| C  | 1.30700100  | -1.19418200 | 0.02066700  | C  | 1.42052700  | -1.19247700 | -0.09989600 |
| C  | 0.90102900  | 0.14850700  | -0.02560400 | C  | 0.97072000  | 0.12031900  | 0.11147000  |
| C  | 2.63227300  | -1.58412000 | 0.04189100  | C  | 2.75560600  | -1.52763000 | -0.21857100 |
| C  | 1.86990300  | 1.14921300  | -0.04945200 | C  | 1.90697600  | 1.14824800  | 0.20771600  |
| C  | 3.59083200  | -0.57140700 | 0.01555100  | C  | 3.68016500  | -0.48828700 | -0.11996700 |
| C  | 3.21287800  | 0.78465900  | -0.03028300 | C  | 3.25884300  | 0.83884900  | 0.09200200  |
| O  | 0.23232400  | -2.05172100 | 0.04236600  | O  | 0.37424600  | -2.08205400 | -0.17020500 |
| H  | 1.60279000  | 2.19733100  | -0.08146000 | H  | 1.60825100  | 2.17562900  | 0.36961200  |
| H  | -1.35364700 | 2.12293400  | -0.09494400 | H  | -1.34455500 | 1.97966300  | 0.49407300  |
| H  | -2.42266700 | -2.77231400 | -0.00020100 | H  | -2.25093500 | -2.90061500 | -0.13837600 |
| H  | 2.92273400  | -2.62495600 | 0.07779600  | H  | 3.07827500  | -2.54664100 | -0.38121100 |
| Cl | 4.41660300  | 2.05239100  | -0.06259200 | Cl | 4.42042900  | 2.14057700  | 0.21575500  |
| Cl | 5.27286800  | -1.03522900 | 0.04097900  | Cl | 5.37444500  | -0.88194600 | -0.26625800 |
| Cl | -4.16259900 | 1.81629300  | -0.49513000 | Cl | -4.80510500 | 2.08018700  | -0.76375000 |
| Cl | -4.85572600 | -1.31979300 | -0.11589900 | Cl | -4.72510200 | -1.53408200 | 0.20852000  |
| C  | -3.79422700 | 1.67158000  | 1.64765500  | C  | -3.95061500 | 1.40486600  | 0.58021800  |
| H  | -4.64294600 | 0.95594000  | 1.77582800  | H  | -4.32940600 | 1.69238000  | 1.55020300  |
|    |             | TS28        |             |    |             | TS29        |             |
| C  | -2.89024000 | 1.04152200  | -0.01042900 | C  | -3.07533000 | 0.63275200  | -0.09049400 |
| C  | -1.53933200 | 1.37938100  | 0.02912500  | C  | -1.67566600 | 1.20912300  | 0.06511500  |
| C  | -0.58342600 | 0.36763400  | -0.01830600 | C  | -0.63005000 | 0.12063400  | 0.05208300  |
| C  | -1.00423100 | -0.97194300 | -0.09744800 | C  | -1.00336300 | -1.20952600 | 0.11347000  |
| C  | -2.34307400 | -1.32483900 | -0.13336900 | C  | -2.31860800 | -1.68101600 | 0.10036900  |
| C  | -3.29616600 | -0.30348800 | -0.09133500 | C  | -3.34437500 | -0.71039600 | -0.02647900 |
| C  | 1.18242900  | -1.05263700 | -0.08582100 | C  | 1.18605700  | -1.22098800 | 0.07249200  |
| C  | 0.86528900  | 0.31177300  | -0.01023900 | C  | 0.79999100  | 0.13627200  | 0.02202500  |
| C  | 2.47801700  | -1.53166800 | -0.10392700 | C  | 2.50054100  | -1.64014100 | 0.05467700  |
| C  | 1.89837000  | 1.24572000  | 0.05013600  | C  | 1.79972900  | 1.11468000  | -0.05824500 |
| C  | 3.50097000  | -0.58621800 | -0.04256800 | C  | 3.48140200  | -0.65043800 | -0.02186600 |
| C  | 3.21317000  | 0.79171000  | 0.03385200  | C  | 3.13000800  | 0.71459500  | -0.07990700 |
| O  | 0.05221300  | -1.83547000 | -0.13881100 | O  | 0.09202500  | -2.04058800 | 0.13098700  |

|       |             |             |             |       |             |             |             |
|-------|-------------|-------------|-------------|-------|-------------|-------------|-------------|
| H     | 1.70262000  | 2.30830900  | 0.10926900  | H     | 1.56319500  | 2.16912900  | -0.10724200 |
| H     | -1.25645800 | 2.42204600  | 0.09239100  | H     | -1.49185300 | 1.90441100  | -0.77859600 |
| H     | -2.62704300 | -2.41928000 | -0.45379400 | H     | -2.54969900 | -2.73465900 | 0.15037200  |
| H     | 2.69656900  | -2.58893800 | -0.16217400 | H     | 2.76773400  | -2.68714600 | 0.09444900  |
| Cl    | 4.49855300  | 1.97363200  | 0.11107100  | Cl    | 4.36264600  | 1.95069800  | -0.18362300 |
| Cl    | 5.14790600  | -1.15870700 | -0.06288300 | Cl    | 5.15205300  | -1.15118800 | -0.04761200 |
| Cl    | -4.06703700 | 2.33218200  | 0.04539700  | Cl    | -4.31910800 | 1.82005500  | -0.29270900 |
| Cl    | -4.98126100 | -0.72930800 | -0.15014200 | Cl    | -4.98458600 | -1.31185900 | -0.11849100 |
| C     | -2.77856600 | -3.27239300 | 0.65396600  | C     | -1.53228600 | 2.01704600  | 1.31776700  |
| H     | -3.32138100 | -2.70828200 | 1.44442500  | H     | -0.52095500 | 2.44639200  | 1.38846800  |
| TS30  |             |             |             |       |             |             |             |
| C     | -2.96098400 | 0.89224800  | 0.04419200  |       |             |             |             |
| C     | -1.61039000 | 1.21522600  | 0.26590000  |       |             |             |             |
| C     | -0.68679800 | 0.21093800  | 0.40977000  |       |             |             |             |
| C     | -1.12130100 | -1.21368900 | 0.52428000  |       |             |             |             |
| C     | -2.44625000 | -1.49101400 | -0.04797000 |       |             |             |             |
| C     | -3.34587000 | -0.46600000 | -0.16947500 |       |             |             |             |
| C     | 1.12509500  | -1.13543300 | 0.01172000  |       |             |             |             |
| C     | 0.74883900  | 0.19265300  | 0.27812300  |       |             |             |             |
| C     | 2.42657300  | -1.50854500 | -0.24388100 |       |             |             |             |
| C     | 1.72849800  | 1.18350800  | 0.28836500  |       |             |             |             |
| C     | 3.40081700  | -0.50411100 | -0.22241100 |       |             |             |             |
| C     | 3.05413900  | 0.83132100  | 0.04421400  |       |             |             |             |
| O     | 0.05547100  | -2.01089900 | -0.01864100 |       |             |             |             |
| H     | 1.48200400  | 2.21786100  | 0.48901500  |       |             |             |             |
| H     | -1.31200300 | 2.25601900  | 0.24450600  |       |             |             |             |
| H     | -2.74543400 | -2.51731800 | -0.21398900 |       |             |             |             |
| H     | 2.69370700  | -2.53505000 | -0.45301000 |       |             |             |             |
| Cl    | 4.26677400  | 2.08811500  | 0.07848500  |       |             |             |             |
| Cl    | 5.05306300  | -0.96123200 | -0.53094100 |       |             |             |             |
| Cl    | -4.11241100 | 2.18427100  | -0.08307600 |       |             |             |             |
| Cl    | -4.99202700 | -0.84667500 | -0.62178000 |       |             |             |             |
| C     | -0.79655900 | -1.92847800 | 1.81819600  |       |             |             |             |
| H     | -1.31868800 | -2.90220900 | 1.75074800  |       |             |             |             |
| IM1-F |             |             |             | IM2-F |             |             |             |
| C     | -3.06525900 | 0.79015400  | -0.00291200 | C     | -3.06856900 | 0.80772200  | -0.00196900 |
| C     | -1.58118800 | 1.31365300  | 0.13362400  | C     | -1.59495300 | 1.32216400  | 0.11062500  |
| C     | -0.55073700 | 0.26310800  | 0.12426000  | C     | -0.54788200 | 0.28191800  | 0.09897200  |
| C     | -0.89771700 | -1.05900000 | 0.13675300  | C     | -0.90452700 | -1.03806700 | 0.10904500  |
| C     | -2.23105200 | -1.57060700 | 0.06803700  | C     | -2.24250300 | -1.54546700 | 0.04304000  |
| C     | -3.23325800 | -0.68094300 | -0.03231200 | C     | -3.24964700 | -0.65512000 | -0.04822500 |
| C     | 1.28595400  | -1.05244100 | 0.04356200  | C     | 1.27990300  | -1.04567500 | 0.02909400  |
| C     | 0.88484500  | 0.29842500  | 0.03763500  | C     | 0.88733000  | 0.30834900  | 0.02496100  |
| C     | 2.60945200  | -1.46105600 | 0.00091700  | C     | 2.60117500  | -1.46244200 | -0.00728500 |

|   |             |             |             |   |             |             |             |
|---|-------------|-------------|-------------|---|-------------|-------------|-------------|
| C | 1.86440300  | 1.29957800  | -0.01783200 | C | 1.87367800  | 1.30366000  | -0.02139600 |
| C | 3.55395400  | -0.44991400 | -0.05935200 | C | 3.55214900  | -0.45696300 | -0.05789500 |
| C | 3.18639600  | 0.90300900  | -0.06940700 | C | 3.19321300  | 0.89860300  | -0.06568400 |
| O | 0.19926100  | -1.88348100 | 0.10559600  | O | 0.18793900  | -1.86983700 | 0.08240400  |
| H | 1.62534500  | 2.35540300  | -0.01828200 | H | 1.64064000  | 2.36080700  | -0.02051800 |
| H | -1.34312000 | 2.22522300  | -0.41488400 | H | -1.40757600 | 2.22894200  | -0.46552200 |
| H | -2.42846300 | -2.63432800 | 0.07346800  | H | -2.43923200 | -2.60945200 | 0.04143100  |
| H | 2.90715300  | -2.50094500 | 0.00817400  | H | 2.89245600  | -2.50416100 | -0.00241500 |
| C | -2.61375200 | 1.48596000  | 1.18385400  | C | -2.57642400 | 1.46208500  | 1.20216100  |
| H | -2.98598600 | 2.39365200  | 1.63517300  | H | -2.59417500 | 1.21993500  | 2.25485700  |
| F | 4.16440800  | 1.82881400  | -0.12580600 | F | 4.17764500  | 1.81779800  | -0.11269300 |
| F | 4.86235500  | -0.76148500 | -0.10965400 | F | 4.85879500  | -0.77636300 | -0.10083300 |
| F | -4.50765900 | -1.09020400 | -0.16285000 | F | -4.52258300 | -1.07013000 | -0.17533900 |
| F | -3.92368900 | 1.43946300  | -0.86940000 | F | -3.93755400 | 1.49291900  | -0.82888300 |
|   |             | IM3-F       |             |   |             | IM5-F       |             |
| C | -3.04515900 | 0.79075400  | -0.27361500 | C | -2.82279900 | 1.00611800  | -0.16358100 |
| C | -1.76567000 | 1.40866900  | 0.08006400  | C | -1.61027100 | 1.40710600  | 0.25474000  |
| C | -0.61882800 | 0.32775000  | 0.51205800  | C | -0.67318100 | 0.39436900  | 0.75814100  |
| C | -1.01924400 | -1.08657600 | 0.35470100  | C | -1.10398300 | -1.17229900 | 0.56385200  |
| C | -2.28015000 | -1.51157700 | 0.14991700  | C | -2.37392300 | -1.43170300 | -0.10235400 |
| C | -3.29518400 | -0.52884300 | -0.12735700 | C | -3.19658000 | -0.39236800 | -0.33907500 |
| C | 1.18325800  | -1.04666200 | 0.10543200  | C | 1.08978000  | -1.01771000 | 0.05638600  |
| C | 0.83660900  | 0.30178600  | 0.20797200  | C | 0.77041300  | 0.30780400  | 0.37566900  |
| C | 2.48186700  | -1.47798700 | -0.10614800 | C | 2.37364700  | -1.40698700 | -0.29576000 |
| C | 1.81983000  | 1.27900600  | 0.11432000  | C | 1.75319800  | 1.28863500  | 0.31660800  |
| C | 3.44855200  | -0.48678700 | -0.21435400 | C | 3.34089900  | -0.41282700 | -0.34631000 |
| C | 3.12578400  | 0.86625900  | -0.10788800 | C | 3.03798200  | 0.91433000  | -0.05163200 |
| O | 0.09965200  | -1.88816900 | 0.24302000  | O | 0.02602500  | -1.88289500 | 0.08516400  |
| H | 1.60493000  | 2.33626900  | 0.20777400  | H | 1.55523300  | 2.32576400  | 0.55714900  |
| H | -1.46608000 | 2.27225100  | -0.51161500 | H | -1.32561900 | 2.44916600  | 0.16983500  |
| H | -2.52545300 | -2.55795800 | 0.02621900  | H | -2.64188900 | -2.43456600 | -0.41144000 |
| H | 2.74767100  | -2.52316200 | -0.18911700 | H | 2.62242200  | -2.43112300 | -0.53911300 |
| C | -1.27013700 | 1.24677300  | 1.44438200  | C | -1.03862500 | -0.51248800 | 1.85930500  |
| H | -1.77634700 | 1.09182100  | 2.38721700  | H | -1.83592900 | -0.39018400 | 2.58028100  |
| F | 4.10987000  | 1.77960300  | -0.21801900 | F | 4.01602700  | 1.83996000  | -0.11606200 |
| F | 4.72956600  | -0.83253600 | -0.42860200 | F | 4.60042800  | -0.73123800 | -0.69477500 |
| F | -4.52608700 | -1.00742400 | -0.40948800 | F | -4.41450800 | -0.59574400 | -0.87257400 |
| F | -3.97902800 | 1.61488200  | -0.79961800 | F | -3.74214200 | 1.89949200  | -0.57813900 |
|   |             | IM6-F       |             |   |             | IM7-F       |             |
| C | -2.87317700 | 1.06735900  | -0.01885800 | C | -2.80763600 | 1.10177700  | 0.01475000  |
| C | -1.51333200 | 1.36721300  | 0.31824300  | C | -1.51111400 | 1.41999700  | 0.13889600  |
| C | -0.59732400 | 0.36762900  | 0.40893700  | C | -0.52332700 | 0.36587100  | 0.15271600  |
| C | -1.00757000 | -1.05226700 | 0.39839700  | C | -0.90283100 | -0.94462200 | 0.10220300  |
| C | -2.50743200 | -1.37888800 | -0.07123500 | C | -2.27574500 | -1.43440700 | 0.07958200  |

|   |             |             |             |   |             |             |             |
|---|-------------|-------------|-------------|---|-------------|-------------|-------------|
| C | -3.31097200 | -0.17999800 | -0.31045700 | C | -3.34677500 | -0.27875100 | -0.03863400 |
| C | 1.18845400  | -0.99410300 | -0.00895500 | C | 1.27813400  | -0.99691400 | -0.02316600 |
| C | 0.84698200  | 0.33769700  | 0.28015300  | C | 0.92104100  | 0.35845800  | 0.09150500  |
| C | 2.48677700  | -1.39007100 | -0.29303700 | C | 2.58676600  | -1.44428700 | -0.11499900 |
| C | 1.84093600  | 1.31916200  | 0.29278600  | C | 1.93039500  | 1.32863400  | 0.10829700  |
| C | 3.45726200  | -0.39914400 | -0.26070600 | C | 3.56341700  | -0.46291100 | -0.09278000 |
| C | 3.14223000  | 0.93178800  | 0.02934900  | C | 3.23950800  | 0.89645600  | 0.01556500  |
| O | 0.11467900  | -1.84061700 | -0.00217100 | O | 0.16225000  | -1.79646800 | -0.02617200 |
| H | 1.62885900  | 2.35984700  | 0.50320200  | H | 1.72547600  | 2.38835200  | 0.19148400  |
| H | -1.23161600 | 2.41277700  | 0.34681000  | H | -1.22527800 | 2.46178700  | 0.21293400  |
| H | -2.67917200 | -2.21948600 | -0.74223900 | H | -2.44604500 | -2.34271600 | -0.49750800 |
| H | 2.74912600  | -2.41416900 | -0.52147800 | H | 2.84985300  | -2.48995000 | -0.20040100 |
| C | -1.99209200 | -1.64253400 | 1.27997800  | C | -3.30408400 | -1.14697100 | 1.11541000  |
| H | -2.35006700 | -1.44678700 | 2.28044400  | H | -4.05570800 | -1.81293300 | 1.51213400  |
| F | 4.13548400  | 1.84239100  | 0.04658300  | F | 4.24575900  | 1.79293700  | 0.02879100  |
| F | 4.73870400  | -0.71921700 | -0.50708500 | F | 4.86084700  | -0.81085000 | -0.17756200 |
| F | -4.51105400 | -0.36638600 | -0.89687400 | F | -4.37592600 | -0.41920000 | -0.94796800 |
| F | -3.69635700 | 2.12206500  | -0.21117400 | F | -3.75654700 | 2.05858400  | -0.04829900 |
|   |             | IM8-F       |             |   |             | P1-F        |             |
| C | -2.82912500 | 1.08246400  | -0.00520100 | C | -3.54214100 | 0.68698900  | -0.00017700 |
| C | -1.52847600 | 1.40207600  | 0.10730200  | C | -1.22340400 | 1.66314100  | -0.00005600 |
| C | -0.53311900 | 0.35078100  | 0.12113800  | C | -0.41391500 | 0.47352200  | -0.00003000 |
| C | -0.90151600 | -0.96295100 | 0.06777900  | C | -0.87110000 | -0.85140600 | -0.00002100 |
| C | -2.28435300 | -1.44002200 | 0.05057900  | C | -2.15431100 | -1.41596100 | 0.00054700  |
| C | -3.34984000 | -0.29892800 | -0.03535300 | C | -3.34358500 | -0.68005200 | 0.00016500  |
| C | 1.27986600  | -1.00019200 | -0.03227400 | C | 1.33385500  | -0.97600800 | -0.00036100 |
| C | 0.91195700  | 0.35345600  | 0.07177700  | C | 1.02147600  | 0.39319100  | -0.00026900 |
| C | 2.59201300  | -1.43925200 | -0.11109800 | C | 2.62102200  | -1.47934000 | -0.00033900 |
| C | 1.91481400  | 1.33035300  | 0.09117800  | C | 2.06903300  | 1.32685000  | 0.00010300  |
| C | 3.56190900  | -0.45123000 | -0.08595200 | C | 3.63766800  | -0.53350900 | -0.00008800 |
| C | 3.22762400  | 0.90638600  | 0.01208100  | C | 3.36283700  | 0.83998600  | 0.00013800  |
| O | 0.16888100  | -1.80758700 | -0.04073500 | O | 0.18455800  | -1.72458300 | -0.00018200 |
| H | 1.70245400  | 2.38925000  | 0.16575900  | H | 1.90565900  | 2.39678300  | 0.00018400  |
| H | -1.24322100 | 2.44485000  | 0.17082200  | H | -0.68469100 | 2.60423500  | 0.00003500  |
| H | -2.50015400 | -2.32128500 | -0.55356100 | H | -2.24144400 | -2.49388800 | 0.00102100  |
| H | 2.86261400  | -2.48361900 | -0.18867900 | H | 2.84402600  | -2.53762900 | -0.00037200 |
| C | -3.24354000 | -1.15001200 | 1.13872000  | C | -2.58063600 | 1.74218900  | 0.00010100  |
| H | -3.16791600 | -0.97597900 | 2.20199600  | H | -3.03049600 | 2.72928000  | 0.00025600  |
| F | 4.22744000  | 1.80984100  | 0.02893500  | F | 4.40153500  | 1.69813700  | 0.00040200  |
| F | 4.86234400  | -0.79073300 | -0.15753800 | F | 4.92140500  | -0.93588200 | -0.00006000 |
| F | -4.41557500 | -0.47079400 | -0.89519800 | F | -4.46494000 | -1.42571400 | 0.00037100  |
| F | -3.77577600 | 2.04167700  | -0.06670100 | F | -4.83247900 | 1.10349600  | -0.00048400 |
|   |             | P3-F        |             |   |             | P4-F        |             |
| C | -2.86225400 | 0.95845800  | -0.08011700 | C | -2.82831300 | 1.08051500  | -0.00038100 |

|   |             |             |             |   |             |             |             |
|---|-------------|-------------|-------------|---|-------------|-------------|-------------|
| C | -1.57149900 | 1.48551000  | 0.11930800  | C | -1.47836200 | 1.19266500  | 0.00006000  |
| C | -0.61597300 | 0.68458500  | 0.73504800  | C | -0.52234600 | 0.11232600  | 0.00034600  |
| C | -1.16790700 | -1.38397300 | 0.52474600  | C | -0.78987200 | -1.25726400 | 0.00010500  |
| C | -2.34019600 | -1.51422500 | -0.20534500 | C | -3.27097600 | -1.42342700 | 0.00043000  |
| C | -3.20521100 | -0.40541200 | -0.23895900 | C | -3.64900000 | -0.09777400 | -0.00023100 |
| C | 1.06486800  | -0.95458900 | 0.13422900  | C | 1.40912600  | -1.07874400 | -0.00047700 |
| C | 0.77825000  | 0.41845500  | 0.34532800  | C | 0.90890400  | 0.23450200  | -0.00015400 |
| C | 2.35306400  | -1.39403700 | -0.14773700 | C | 2.75527900  | -1.39550800 | -0.00050500 |
| C | 1.81708600  | 1.34333500  | 0.21062600  | C | 1.81485100  | 1.30698700  | 0.00029500  |
| C | 3.36039300  | -0.45204900 | -0.25420400 | C | 3.62779400  | -0.31647600 | -0.00012300 |
| C | 3.09432500  | 0.90570800  | -0.08713200 | C | 3.16327400  | 1.00608100  | 0.00023800  |
| O | 0.03534100  | -1.87791900 | 0.07662000  | O | 0.37766300  | -1.97802700 | -0.00050200 |
| H | 1.64836900  | 2.40065500  | 0.37194600  | H | 1.50217100  | 2.34326900  | 0.00048600  |
| H | -1.33471300 | 2.41604200  | -0.38696400 | H | -1.09426000 | 2.20588300  | 0.00017400  |
| H | -2.52825900 | -2.33720200 | -0.88550200 | H | -4.10886700 | -2.11370900 | 0.00160600  |
| H | 2.56388400  | -2.44285500 | -0.30925200 | H | 3.12524500  | -2.41177700 | -0.00071000 |
| C | -1.13975500 | -0.39092900 | 1.55931600  | C | -1.99510000 | -1.98887100 | 0.00035600  |
| H | -2.02389200 | -0.23401800 | 2.16475600  | H | -1.90957900 | -3.06723500 | 0.00103200  |
| F | 4.10247700  | 1.79054600  | -0.20027700 | F | 4.07309000  | 1.99969800  | 0.00064100  |
| F | 4.61443200  | -0.84441600 | -0.53527700 | F | 4.95531700  | -0.53374800 | -0.00010000 |
| F | -4.44313800 | -0.61985500 | -0.73498400 | F | -4.98192500 | 0.15194800  | 0.00054700  |
| F | -3.82924500 | 1.83102600  | -0.44708200 | F | -3.53621300 | 2.22851400  | -0.00090200 |
|   |             | TS2-F       |             |   |             | TS3-F       |             |
| C | -3.17470000 | 0.76200300  | 0.04666500  | C | -3.26740700 | 0.75276500  | 0.07804300  |
| C | -1.50007400 | 1.37065300  | 0.24878300  | C | -1.50228100 | 1.40686100  | 0.30610000  |
| C | -0.53843100 | 0.29691200  | 0.21635200  | C | -0.51904600 | 0.36682400  | 0.26973300  |
| C | -0.89469500 | -1.03378600 | 0.27391600  | C | -0.90829000 | -0.96680500 | 0.33217600  |
| C | -2.20032700 | -1.54881600 | 0.10715500  | C | -2.20303700 | -1.48335200 | 0.10093400  |
| C | -3.22510700 | -0.68580000 | -0.08847000 | C | -3.26319700 | -0.65308300 | -0.15311800 |
| C | 1.29102400  | -1.03675400 | 0.11412400  | C | 1.27952400  | -1.00724400 | 0.14039900  |
| C | 0.89787300  | 0.31298900  | 0.06390400  | C | 0.91243200  | 0.34916300  | 0.07807300  |
| C | 2.61135300  | -1.45392600 | 0.05189800  | C | 2.59123400  | -1.44972600 | 0.06515000  |
| C | 1.87877000  | 1.30544800  | -0.05675900 | C | 1.90937900  | 1.32149400  | -0.06882000 |
| C | 3.55861200  | -0.45203600 | -0.07983000 | C | 3.55471500  | -0.46779500 | -0.09574500 |
| C | 3.19752100  | 0.90088700  | -0.13466100 | C | 3.21879700  | 0.89116600  | -0.16381200 |
| O | 0.20547100  | -1.86017800 | 0.24251600  | O | 0.18322200  | -1.81032600 | 0.29661800  |
| H | 1.64511100  | 2.36209700  | -0.08661400 | H | 1.69342300  | 2.38164000  | -0.10594900 |
| H | -1.21855800 | 2.29519800  | -0.25600200 | H | -1.37660300 | 2.31060000  | -0.28663400 |
| H | -2.36940600 | -2.61400700 | 0.01951000  | H | -2.32914400 | -2.54900200 | -0.04373900 |
| H | 2.90411800  | -2.49431200 | 0.09513900  | H | 2.86522300  | -2.49476800 | 0.11777900  |
| C | -2.63407800 | 1.47123300  | 1.16546400  | C | -2.61236800 | 1.31844600  | 1.22955700  |
| H | -3.03964900 | 2.40613000  | 1.52867700  | H | -2.58121900 | 0.85941300  | 2.21206000  |
| F | 4.17663700  | 1.81899900  | -0.25780200 | F | 4.21301500  | 1.78807200  | -0.31535200 |
| F | 4.86299200  | -0.77367500 | -0.15666400 | F | 4.85091000  | -0.81529000 | -0.18948700 |

|   |             |             |             |   |             |             |             |
|---|-------------|-------------|-------------|---|-------------|-------------|-------------|
| F | -4.42503300 | -1.16099400 | -0.48318300 | F | -4.37684500 | -1.17517100 | -0.71512000 |
| F | -4.07813100 | 1.41258900  | -0.74813800 | F | -4.11821300 | 1.50266100  | -0.66654000 |
|   |             | TS4-F       |             |   |             | TS8-F       |             |
| C | -3.06107400 | 0.79573900  | -0.27725600 | C | -2.83236600 | 0.99883500  | -0.13599900 |
| C | -1.81120900 | 1.43959900  | 0.08746300  | C | -1.60534200 | 1.41837500  | 0.24085100  |
| C | -0.60039300 | 0.33390100  | 0.54389700  | C | -0.66377500 | 0.43699900  | 0.76257400  |
| C | -1.01364500 | -1.06531300 | 0.38648500  | C | -1.11119300 | -1.21427600 | 0.55605800  |
| C | -2.28444800 | -1.49062600 | 0.20918300  | C | -2.35869700 | -1.44241500 | -0.13788900 |
| C | -3.30055500 | -0.52636300 | -0.09043600 | C | -3.19617500 | -0.39569600 | -0.32219000 |
| C | 1.18276500  | -1.04327800 | 0.09593500  | C | 1.09143800  | -1.01174300 | 0.07457400  |
| C | 0.84739900  | 0.30627900  | 0.23073500  | C | 0.76854800  | 0.31977900  | 0.37045500  |
| C | 2.47638100  | -1.47970800 | -0.13787100 | C | 2.37820500  | -1.40705800 | -0.26085300 |
| C | 1.83855400  | 1.27842200  | 0.14956300  | C | 1.75517700  | 1.29771100  | 0.29144200  |
| C | 3.44873100  | -0.49376500 | -0.23481800 | C | 3.34662700  | -0.41622900 | -0.32672900 |
| C | 3.13775800  | 0.85996800  | -0.09441800 | C | 3.04101700  | 0.91705700  | -0.06270200 |
| O | 0.09531900  | -1.87627200 | 0.23220400  | O | 0.03232200  | -1.88524800 | 0.08754500  |
| H | 1.63262700  | 2.33495100  | 0.26766700  | H | 1.55695300  | 2.33895700  | 0.51297700  |
| H | -1.51069800 | 2.29796600  | -0.51091300 | H | -1.32083900 | 2.45202400  | 0.08112400  |
| H | -2.52664500 | -2.53993500 | 0.10347700  | H | -2.60589800 | -2.42120200 | -0.53092200 |
| H | 2.73361600  | -2.52485900 | -0.24478900 | H | 2.62570700  | -2.43594000 | -0.48480500 |
| C | -1.28246300 | 1.26482700  | 1.43088700  | C | -1.06566700 | -0.49851900 | 1.81320700  |
| H | -1.77432900 | 1.12053300  | 2.38372000  | H | -1.90804500 | -0.36285000 | 2.47970800  |
| F | 4.12914800  | 1.76668300  | -0.19343200 | F | 4.01878000  | 1.84138900  | -0.14113100 |
| F | 4.72499100  | -0.84348000 | -0.46976100 | F | 4.60767400  | -0.74198400 | -0.66197500 |
| F | -4.52102500 | -1.02167400 | -0.39157800 | F | -4.41159000 | -0.59947700 | -0.86423600 |
| F | -3.97577100 | 1.56996400  | -0.90666100 | F | -3.75855700 | 1.88830300  | -0.54768300 |
|   |             | TS11-F      |             |   |             | TS13-F      |             |
| C | -2.86347200 | 1.06261800  | 0.03790900  | C | -2.79128700 | 1.10046000  | -0.01021200 |
| C | -1.52312100 | 1.32546700  | 0.42864500  | C | -1.48658600 | 1.37389300  | 0.20008600  |
| C | -0.59873200 | 0.31857500  | 0.48396100  | C | -0.52496600 | 0.32038900  | 0.27112600  |
| C | -0.98523400 | -1.09077100 | 0.45004300  | C | -0.89894300 | -0.99959800 | 0.15527900  |
| C | -2.57413100 | -1.38595800 | -0.09562800 | C | -2.22256600 | -1.54179300 | 0.15208700  |
| C | -3.31041000 | -0.16762800 | -0.34151200 | C | -3.42132800 | -0.21631800 | 0.00717400  |
| C | 1.20089700  | -1.01062700 | 0.02880000  | C | 1.28465600  | -1.00974900 | -0.05167300 |
| C | 0.84321000  | 0.31493400  | 0.32180900  | C | 0.91955900  | 0.32824700  | 0.17128600  |
| C | 2.49579300  | -1.38964900 | -0.28983900 | C | 2.59486300  | -1.43274500 | -0.21401700 |
| C | 1.82218200  | 1.31199000  | 0.30611300  | C | 1.91770000  | 1.30764000  | 0.22550400  |
| C | 3.45133800  | -0.38425300 | -0.28349900 | C | 3.56190400  | -0.44331700 | -0.15204300 |
| C | 3.12189800  | 0.94247600  | 0.01166100  | C | 3.22822000  | 0.90066200  | 0.06231200  |
| O | 0.13759900  | -1.87181600 | 0.08037000  | O | 0.18074900  | -1.82180400 | -0.08052800 |
| H | 1.60044200  | 2.35070500  | 0.51609200  | H | 1.70382500  | 2.35564900  | 0.39272400  |
| H | -1.23301800 | 2.36646800  | 0.50620200  | H | -1.17551500 | 2.41134700  | 0.20498100  |
| H | -2.73702300 | -2.20699300 | -0.79241300 | H | -2.35512400 | -2.47391500 | -0.39646700 |
| H | 2.76719000  | -2.41061000 | -0.52174100 | H | 2.86596400  | -2.46622700 | -0.38224100 |

|         |             |             |             |         |             |             |             |
|---------|-------------|-------------|-------------|---------|-------------|-------------|-------------|
| C       | -2.03971700 | -1.68170200 | 1.23018100  | C       | -3.30168500 | -1.16382800 | 1.06846800  |
| H       | -2.40639700 | -1.55087100 | 2.23912200  | H       | -4.09322400 | -1.83911600 | 1.36378200  |
| F       | 4.10108400  | 1.86820000  | 0.00074000  | F       | 4.22491500  | 1.80669700  | 0.10940600  |
| F       | 4.73148600  | -0.68441700 | -0.56137600 | F       | 4.85916300  | -0.76881100 | -0.30065400 |
| F       | -4.43308700 | -0.27331500 | -1.08565800 | F       | -4.49321600 | -0.31737300 | -0.83315200 |
| F       | -3.65892600 | 2.13764400  | -0.16727100 | F       | -3.65188000 | 2.10649000  | -0.29235700 |
| TS14-F  |             |             |             |         |             |             |             |
| C       | -2.81833800 | 1.08794000  | -0.05964700 |         |             |             |             |
| C       | -1.49681500 | 1.30933400  | 0.20550100  |         |             |             |             |
| C       | -0.54832200 | 0.25201300  | 0.32160600  |         |             |             |             |
| C       | -0.89456400 | -1.08467400 | 0.16598200  |         |             |             |             |
| C       | -2.21737500 | -1.59715900 | 0.16646500  |         |             |             |             |
| C       | -3.47413800 | -0.17713900 | 0.04169800  |         |             |             |             |
| C       | 1.28660300  | -1.02989100 | -0.07711400 |         |             |             |             |
| C       | 0.89783200  | 0.28856000  | 0.20917200  |         |             |             |             |
| C       | 2.60237800  | -1.41734400 | -0.27696900 |         |             |             |             |
| C       | 1.87614400  | 1.28523900  | 0.28997500  |         |             |             |             |
| C       | 3.55037700  | -0.41140600 | -0.18645500 |         |             |             |             |
| C       | 3.19273900  | 0.91430900  | 0.09072900  |         |             |             |             |
| O       | 0.20057800  | -1.86632400 | -0.12622000 |         |             |             |             |
| H       | 1.64332300  | 2.32014800  | 0.50658100  |         |             |             |             |
| H       | -1.14890300 | 2.33483600  | 0.16029300  |         |             |             |             |
| H       | -2.47525400 | -2.44983300 | -0.45799900 |         |             |             |             |
| H       | 2.89153100  | -2.43661600 | -0.49462900 |         |             |             |             |
| C       | -3.18032900 | -1.07987400 | 1.12170700  |         |             |             |             |
| H       | -3.00164100 | -0.81439400 | 2.15774200  |         |             |             |             |
| F       | 4.17071900  | 1.83872600  | 0.16361400  |         |             |             |             |
| F       | 4.85124600  | -0.70329700 | -0.36750700 |         |             |             |             |
| F       | -4.57079600 | -0.37094500 | -0.73051200 |         |             |             |             |
| F       | -3.58126100 | 2.11740600  | -0.50316500 |         |             |             |             |
| Species | x           | y           | z           | Species | x           | y           | z           |
| IM1-Br  |             |             |             | IM2-Br  |             |             |             |
| C       | -3.11547300 | 0.64130200  | 0.37329800  | C       | -3.11773400 | 0.63877800  | 0.36691500  |
| C       | -1.60400800 | 1.10163000  | 0.53137500  | C       | -1.61129400 | 1.10587200  | 0.50509100  |
| C       | -0.60902000 | 0.03330500  | 0.34691400  | C       | -0.60439900 | 0.04691900  | 0.32654500  |
| C       | -1.00531700 | -1.26359500 | 0.18596900  | C       | -1.00291700 | -1.25230600 | 0.17810800  |
| C       | -2.35725400 | -1.71884000 | 0.11392200  | C       | -2.35506200 | -1.71147900 | 0.10378800  |
| C       | -3.35810400 | -0.81225900 | 0.17066000  | C       | -3.36337800 | -0.80877000 | 0.15546400  |
| C       | 1.17193700  | -1.31715700 | 0.01225700  | C       | 1.17560700  | -1.30964400 | 0.01111800  |
| C       | 0.82180700  | 0.03251700  | 0.21188800  | C       | 0.82675800  | 0.04227700  | 0.19821200  |
| C       | 2.47558600  | -1.75083600 | -0.13768500 | C       | 2.47903600  | -1.74644800 | -0.13145000 |
| C       | 1.83771700  | 0.99223800  | 0.25859300  | C       | 1.84386800  | 1.00092100  | 0.24081400  |
| C       | 3.47592200  | -0.77966000 | -0.09428800 | C       | 3.48063200  | -0.77634100 | -0.09246500 |
| C       | 3.15669700  | 0.58045700  | 0.10068100  | C       | 3.16281700  | 0.58581800  | 0.09062700  |



|        |             |             |             |        |             |             |             |
|--------|-------------|-------------|-------------|--------|-------------|-------------|-------------|
| O      | 0.05883000  | -2.11305400 | -0.00319100 | O      | 0.06139100  | -2.10412600 | -0.00134800 |
| H      | 1.61661500  | 2.03951400  | 0.41570100  | H      | 1.62338300  | 2.04961200  | 0.38902200  |
| H      | -1.34947200 | 2.06488300  | 0.09071500  | H      | -1.39539700 | 2.07075100  | 0.05062800  |
| H      | -2.56231800 | -2.77596200 | 0.00964000  | H      | -2.55438100 | -2.76939700 | -0.00375500 |
| H      | 2.71325600  | -2.79504200 | -0.28660100 | H      | 2.71566900  | -2.79208000 | -0.27174000 |
| C      | -2.58938200 | 1.13624600  | 1.62443400  | C      | -2.56768600 | 1.10467200  | 1.61971800  |
| H      | -2.90834300 | 1.89339300  | 2.32360500  | H      | -2.59423800 | 0.72926300  | 2.63214600  |
| Br     | 4.50932800  | 1.92936800  | 0.16584100  | Br     | 4.51731900  | 1.93283500  | 0.15047500  |
| Br     | 5.27592200  | -1.37323200 | -0.30951400 | Br     | 5.28035800  | -1.37431600 | -0.29698700 |
| Br     | -5.16416100 | -1.42102200 | 0.10322700  | Br     | -5.16393800 | -1.42659500 | 0.06718800  |
| Br     | -4.27214700 | 1.87133000  | -0.66571400 | Br     | -4.30127200 | 1.89731200  | -0.61268800 |
| IM3-Br |             |             |             | IM5-Br |             |             |             |
| C      | -3.09185900 | 0.61277200  | 0.07663700  | C      | -2.90403800 | 0.66311700  | 0.21346700  |
| C      | -1.77651600 | 1.16785100  | 0.44982700  | C      | -1.65976500 | 1.05951900  | 0.56491000  |
| C      | -0.63578500 | 0.05968800  | 0.79624000  | C      | -0.69763800 | 0.08898400  | 1.09179100  |
| C      | -1.06667200 | -1.32827300 | 0.55566100  | C      | -1.12225500 | -1.47712700 | 0.98566400  |
| C      | -2.33909200 | -1.72059400 | 0.35767200  | C      | -2.40700500 | -1.76161700 | 0.36788400  |
| C      | -3.36544800 | -0.71467800 | 0.16557700  | C      | -3.27736900 | -0.75435600 | 0.11414100  |
| C      | 1.13103600  | -1.31469800 | 0.26617800  | C      | 1.05639100  | -1.34329400 | 0.41649600  |
| C      | 0.81218900  | 0.03010600  | 0.46452800  | C      | 0.73795800  | -0.00532200 | 0.68053600  |
| C      | 2.41422100  | -1.74723500 | -0.00300700 | C      | 2.33097400  | -1.73556300 | 0.04809000  |
| C      | 1.81168700  | 0.98666300  | 0.40858200  | C      | 1.71173400  | 0.96996700  | 0.54449000  |
| C      | 3.41679700  | -0.77391700 | -0.07591000 | C      | 3.30892200  | -0.74528600 | -0.08303600 |
| C      | 3.12078400  | 0.58151200  | 0.12654000  | C      | 3.00418300  | 0.60012500  | 0.15640500  |
| O      | 0.03352900  | -2.14243400 | 0.37152700  | O      | 0.00046000  | -2.21076500 | 0.51977000  |
| H      | 1.59923700  | 2.03434400  | 0.57732700  | H      | 1.49316000  | 2.01142000  | 0.74158100  |
| H      | -1.44674600 | 2.05753900  | -0.08128500 | H      | -1.35479800 | 2.08902100  | 0.42245600  |
| H      | -2.58055500 | -2.75961000 | 0.18323200  | H      | -2.64700100 | -2.78651300 | 0.11352200  |
| H      | 2.63795400  | -2.79378500 | -0.15640700 | H      | 2.55988300  | -2.77411700 | -0.14660200 |
| C      | -1.27385600 | 0.91658700  | 1.79512400  | C      | -1.03100700 | -0.76038500 | 2.24723100  |
| H      | -1.77733600 | 0.69131200  | 2.72530900  | H      | -1.80328200 | -0.60538000 | 2.98844400  |
| Br     | 4.46066300  | 1.93887900  | 0.04070900  | Br     | 4.30502100  | 1.98785000  | -0.01087300 |
| Br     | 5.18450600  | -1.37611400 | -0.46165500 | Br     | 5.05404400  | -1.30967000 | -0.60756600 |
| Br     | -5.11594700 | -1.41103700 | -0.15578800 | Br     | -5.00700200 | -1.24111800 | -0.53997800 |
| Br     | -4.34767100 | 1.91612700  | -0.52390200 | Br     | -4.13944000 | 2.01891300  | -0.33775400 |
| IM6-Br |             |             |             | IM7-Br |             |             |             |
| C      | -2.98437700 | 0.61774600  | 0.23541000  | C      | -2.96330800 | 0.69534300  | 0.24797600  |
| C      | -1.60585500 | 0.96330400  | 0.49145400  | C      | -1.65747500 | 1.03109800  | 0.28039900  |
| C      | -0.66300200 | -0.00114900 | 0.64879800  | C      | -0.63765300 | 0.01348600  | 0.36161900  |
| C      | -1.03149700 | -1.41929300 | 0.79870000  | C      | -0.97589100 | -1.30214300 | 0.49099800  |
| C      | -2.52932700 | -1.81067400 | 0.40689500  | C      | -2.33449000 | -1.82252800 | 0.58286600  |
| C      | -3.39648300 | -0.66811300 | 0.06466700  | C      | -3.44481200 | -0.70842700 | 0.36565900  |
| C      | 1.14759200  | -1.35379000 | 0.31657500  | C      | 1.19714100  | -1.31313100 | 0.27016700  |
| C      | 0.77840000  | -0.00815200 | 0.47574500  | C      | 0.80322600  | 0.03484300  | 0.23259700  |

|    |             |             |             |    |             |             |             |
|----|-------------|-------------|-------------|----|-------------|-------------|-------------|
| C  | 2.44677300  | -1.73824800 | 0.03624000  | C  | 2.51038800  | -1.73013100 | 0.17251600  |
| C  | 1.74645900  | 0.98547600  | 0.35822100  | C  | 1.78431900  | 1.01606800  | 0.08133600  |
| C  | 3.41106600  | -0.73212500 | -0.06570300 | C  | 3.47905500  | -0.73700900 | 0.02478800  |
| C  | 3.06620400  | 0.62089800  | 0.09634500  | C  | 3.11644100  | 0.62394800  | -0.02079600 |
| O  | 0.09963200  | -2.21994400 | 0.44856400  | O  | 0.10507600  | -2.13545600 | 0.41949700  |
| H  | 1.49201800  | 2.03127200  | 0.46981200  | H  | 1.53066800  | 2.06708100  | 0.04374000  |
| H  | -1.32613100 | 2.00559400  | 0.41226200  | H  | -1.37188600 | 2.07471000  | 0.24421200  |
| H  | -2.67608300 | -2.73073400 | -0.15487800 | H  | -2.49449100 | -2.79253200 | 0.11431600  |
| H  | 2.70991800  | -2.77913300 | -0.09044200 | H  | 2.77977400  | -2.77667500 | 0.20733200  |
| C  | -1.98418400 | -1.91939100 | 1.76654100  | C  | -3.31248100 | -1.41940200 | 1.61288200  |
| H  | -2.32306900 | -1.60404600 | 2.74306900  | H  | -3.99219600 | -1.98106600 | 2.23424900  |
| Br | 4.35955100  | 2.02034200  | -0.03319000 | Br | 4.42212100  | 2.00438500  | -0.22457500 |
| Br | 5.20148000  | -1.27853100 | -0.42502500 | Br | 5.29580100  | -1.30450600 | -0.11005900 |
| Br | -5.09747500 | -1.14269900 | -0.64727700 | Br | -4.93780700 | -1.22613400 | -0.83087900 |
| Br | -4.15167900 | 2.10425000  | -0.05872600 | Br | -4.28523600 | 2.07482700  | 0.18214600  |
|    | IM8-Br      |             |             |    | P1-Br       |             |             |
| C  | -2.96576400 | 0.69190000  | 0.22615600  | C  | -3.55191400 | 0.77938500  | -0.00033100 |
| C  | -1.65583700 | 1.02113700  | 0.25844500  | C  | -1.15774700 | 1.65581100  | -0.00064700 |
| C  | -0.63668200 | -0.00033000 | 0.33789100  | C  | -0.38366400 | 0.45015900  | -0.00062400 |
| C  | -0.97231200 | -1.31945600 | 0.44845800  | C  | -0.90267000 | -0.85086100 | -0.00056800 |
| C  | -2.33709000 | -1.82757700 | 0.53910700  | C  | -2.20598500 | -1.35608000 | -0.00070900 |
| C  | -3.43949700 | -0.70962500 | 0.35519300  | C  | -3.39798000 | -0.59856100 | -0.00030500 |
| C  | 1.20189900  | -1.32273600 | 0.24475100  | C  | 1.29471200  | -1.07522800 | -0.00025700 |
| C  | 0.80477200  | 0.02477100  | 0.21594800  | C  | 1.04489700  | 0.30653700  | -0.00036300 |
| C  | 2.51655000  | -1.73597500 | 0.15041800  | C  | 2.55640500  | -1.62852900 | -0.00005200 |
| C  | 1.78463900  | 1.00930100  | 0.07746600  | C  | 2.13552900  | 1.18394000  | -0.00032700 |
| C  | 3.48378400  | -0.73956400 | 0.01615500  | C  | 3.63679200  | -0.73916500 | 0.00001700  |
| C  | 3.11813700  | 0.62093600  | -0.02069900 | C  | 3.42287900  | 0.65310600  | -0.00012100 |
| O  | 0.11096100  | -2.14892900 | 0.38028300  | O  | 0.11398200  | -1.77304000 | -0.00033700 |
| H  | 1.52892400  | 2.06002900  | 0.04622500  | H  | 1.99898600  | 2.25700600  | -0.00043400 |
| H  | -1.36497400 | 2.06317600  | 0.21833100  | H  | -0.59368700 | 2.58274900  | -0.00080700 |
| H  | -2.53518200 | -2.78131800 | 0.05437500  | H  | -2.29399500 | -2.43303000 | -0.00088100 |
| H  | 2.78795400  | -2.78223000 | 0.17766100  | H  | 2.70990900  | -2.69854000 | 0.00003700  |
| C  | -3.26342800 | -1.40879900 | 1.60525500  | C  | -2.51018900 | 1.78547900  | -0.00053400 |
| H  | -3.18594100 | -1.09950500 | 2.63693300  | H  | -2.88447500 | 2.80132100  | -0.00059900 |
| Br | 4.42170300  | 2.00575100  | -0.20714700 | Br | 4.87899600  | 1.89051200  | 0.00002500  |
| Br | 5.30250100  | -1.30176200 | -0.11285200 | Br | 5.38570200  | -1.49744200 | 0.00037600  |
| Br | -4.98690400 | -1.24107900 | -0.76800900 | Br | -4.95495800 | -1.72221900 | 0.00007700  |
| Br | -4.27882800 | 2.07730100  | 0.14792100  | Br | -5.30216900 | 1.56568800  | 0.00050200  |
|    | P3-Br       |             |             |    | P4-Br       |             |             |
| C  | -2.94450500 | 0.62984200  | 0.18744300  | C  | -2.93702300 | 0.41990500  | 0.02197200  |
| C  | -1.62115200 | 1.14337100  | 0.31445700  | C  | -1.57735800 | 0.54728300  | 0.03055500  |
| C  | -0.65461800 | 0.39763700  | 0.96347600  | C  | -0.57520200 | -0.48556500 | 0.02277100  |
| C  | -1.18077500 | -1.67243800 | 0.83443500  | C  | -0.77784700 | -1.86173700 | 0.03854100  |

|    |             |             |             |    |             |             |             |
|----|-------------|-------------|-------------|----|-------------|-------------|-------------|
| C  | -2.34403800 | -1.81850400 | 0.10884200  | C  | -3.24962600 | -2.10859600 | 0.02815200  |
| C  | -3.27370200 | -0.74095500 | 0.08281300  | C  | -3.72356300 | -0.79337100 | 0.00332900  |
| C  | 1.04416900  | -1.24321500 | 0.41250500  | C  | 1.40775000  | -1.58946900 | 0.02388600  |
| C  | 0.74372500  | 0.13213300  | 0.57673400  | C  | 0.85183600  | -0.30062900 | 0.01303400  |
| C  | 2.33338600  | -1.66911800 | 0.13361200  | C  | 2.76281300  | -1.84344400 | 0.01921500  |
| C  | 1.77020400  | 1.05688500  | 0.40274200  | C  | 1.71518400  | 0.80103200  | -0.00339100 |
| C  | 3.34790700  | -0.72630300 | -0.02073100 | C  | 3.61244000  | -0.73370200 | 0.00272900  |
| C  | 3.06598400  | 0.63994600  | 0.10363700  | C  | 3.08865800  | 0.57502300  | -0.00832000 |
| O  | 0.02883100  | -2.18424600 | 0.41458200  | O  | 0.41496900  | -2.53417100 | 0.03989500  |
| H  | 1.56817200  | 2.11223600  | 0.53084900  | H  | 1.33984200  | 1.81560100  | -0.01298000 |
| H  | -1.37278100 | 2.03517700  | -0.25087900 | H  | -1.19299700 | 1.55877700  | 0.04846400  |
| H  | -2.49729500 | -2.66009200 | -0.55624100 | H  | -4.03001400 | -2.86090700 | 0.02597000  |
| H  | 2.53503800  | -2.72488700 | 0.01407200  | H  | 3.15428600  | -2.85098500 | 0.02789900  |
| C  | -1.15201600 | -0.64724300 | 1.84264500  | C  | -1.96057800 | -2.62608200 | 0.05142800  |
| H  | -2.01484500 | -0.48223600 | 2.47548500  | H  | -1.84479800 | -3.70208400 | 0.07089200  |
| Br | 4.40535300  | 1.98315900  | -0.10081100 | Br | 4.22830400  | 2.10834700  | -0.03104800 |
| Br | 5.09680500  | -1.37285700 | -0.41540000 | Br | 5.48788400  | -1.07551700 | -0.00398200 |
| Br | -5.04388600 | -1.25944000 | -0.45843400 | Br | -5.63977500 | -0.67378000 | -0.07057700 |
| Br | -4.26559500 | 1.97203900  | -0.20208500 | Br | -3.86415500 | 2.10692400  | 0.05009700  |
|    |             | TS2-Br      |             |    |             | TS3-Br      |             |
| C  | -3.22798300 | 0.63031000  | 0.50511000  | C  | -3.29350900 | 0.61491500  | 0.53956300  |
| C  | -1.50509900 | 1.17696500  | 0.74152400  | C  | -1.51604000 | 1.21136800  | 0.76206700  |
| C  | -0.58611500 | 0.08907800  | 0.55989200  | C  | -0.57484600 | 0.14989200  | 0.60558800  |
| C  | -0.99240300 | -1.22931600 | 0.52325300  | C  | -0.99639400 | -1.17513900 | 0.61630900  |
| C  | -2.31715200 | -1.68551000 | 0.36727800  | C  | -2.31245900 | -1.64897300 | 0.43300000  |
| C  | -3.34578600 | -0.79552800 | 0.24596300  | C  | -3.37332700 | -0.78874300 | 0.25425500  |
| C  | 1.18189200  | -1.29333100 | 0.24929400  | C  | 1.17916900  | -1.25724900 | 0.31978500  |
| C  | 0.83899100  | 0.06779400  | 0.32934000  | C  | 0.84603100  | 0.10778500  | 0.34904500  |
| C  | 2.47896800  | -1.74052000 | 0.07991700  | C  | 2.47192200  | -1.71875300 | 0.15533200  |
| C  | 1.85077200  | 1.02590600  | 0.23396000  | C  | 1.86164400  | 1.05498900  | 0.20594500  |
| C  | 3.47645100  | -0.77109900 | -0.02710500 | C  | 3.47381300  | -0.76052200 | -0.00185100 |
| C  | 3.16265500  | 0.60114400  | 0.04694600  | C  | 3.16922600  | 0.61532500  | 0.02050200  |
| O  | 0.07558300  | -2.08831500 | 0.36746900  | O  | 0.07090900  | -2.04184700 | 0.48261400  |
| H  | 1.63472700  | 2.08370600  | 0.30355700  | H  | 1.65146400  | 2.11573700  | 0.23867800  |
| H  | -1.22265700 | 2.14223300  | 0.32079500  | H  | -1.35687600 | 2.16749300  | 0.27071400  |
| H  | -2.49276800 | -2.74334400 | 0.22506100  | H  | -2.45091000 | -2.71037500 | 0.27488600  |
| H  | 2.71286400  | -2.79471900 | 0.02567500  | H  | 2.69922900  | -2.77567100 | 0.14113200  |
| C  | -2.61122700 | 1.17066200  | 1.68045800  | C  | -2.59938400 | 1.06997500  | 1.71012400  |
| H  | -2.96786900 | 1.98304100  | 2.29760600  | H  | -2.58643500 | 0.59617600  | 2.68534500  |
| Br | 4.50954200  | 1.94987200  | -0.09191400 | Br | 4.52184300  | 1.94907300  | -0.18643500 |
| Br | 5.26489800  | -1.38555300 | -0.27642200 | Br | 5.25547400  | -1.39609800 | -0.24591000 |
| Br | -5.04823000 | -1.49789700 | -0.28462500 | Br | -4.99379000 | -1.53037100 | -0.44675200 |
| Br | -4.40314600 | 1.86375800  | -0.47068000 | Br | -4.45606400 | 1.89431600  | -0.35775000 |
|    |             | TS4-Br      |             |    |             | TS8-Br      |             |

|    |             |             |             |    |             |             |             |
|----|-------------|-------------|-------------|----|-------------|-------------|-------------|
| C  | -3.11397900 | 0.64690700  | 0.11215500  | C  | -2.91413800 | 0.65588600  | 0.23107800  |
| C  | -1.83868300 | 1.22933700  | 0.50532400  | C  | -1.65314400 | 1.07394900  | 0.52932800  |
| C  | -0.60694000 | 0.06990600  | 0.86737300  | C  | -0.68736400 | 0.14398100  | 1.07840700  |
| C  | -1.06326300 | -1.28902200 | 0.60339800  | C  | -1.13054300 | -1.52871100 | 0.95783400  |
| C  | -2.35204200 | -1.67624500 | 0.44915100  | C  | -2.38680400 | -1.77495000 | 0.30195900  |
| C  | -3.37820900 | -0.68744100 | 0.24823500  | C  | -3.27427400 | -0.75512500 | 0.11603500  |
| C  | 1.12221400  | -1.29924100 | 0.24417900  | C  | 1.06032800  | -1.33056800 | 0.42199600  |
| C  | 0.82754100  | 0.03978300  | 0.51623100  | C  | 0.73576200  | 0.01222100  | 0.66098600  |
| C  | 2.39457500  | -1.73601500 | -0.06940100 | C  | 2.34021600  | -1.72743600 | 0.07674800  |
| C  | 1.84299700  | 0.98374800  | 0.49305200  | C  | 1.71441900  | 0.98336600  | 0.50894700  |
| C  | 3.40969800  | -0.77528500 | -0.11079200 | C  | 3.31969200  | -0.74181400 | -0.06523100 |
| C  | 3.13870400  | 0.57346400  | 0.16799300  | C  | 3.00979700  | 0.60834100  | 0.14110700  |
| O  | 0.01611900  | -2.11160000 | 0.33586300  | O  | 0.01002000  | -2.21045900 | 0.50096200  |
| H  | 1.64939300  | 2.02423400  | 0.71888500  | H  | 1.49373300  | 2.02783400  | 0.68632400  |
| H  | -1.49606000 | 2.11136300  | -0.02956400 | H  | -1.35189900 | 2.08851500  | 0.29740600  |
| H  | -2.59339400 | -2.71808600 | 0.29028500  | H  | -2.60451100 | -2.77287400 | -0.05838800 |
| H  | 2.59976600  | -2.77676400 | -0.27825500 | H  | 2.56894300  | -2.76984500 | -0.09671500 |
| C  | -1.28622100 | 0.93815500  | 1.81397300  | C  | -1.06523500 | -0.74786100 | 2.17157000  |
| H  | -1.77303000 | 0.71138200  | 2.75374500  | H  | -1.89194000 | -0.58491700 | 2.85114900  |
| Br | 4.50044200  | 1.91142800  | 0.13089800  | Br | 4.31019900  | 1.99390500  | -0.04308400 |
| Br | 5.16103700  | -1.38194100 | -0.55847800 | Br | 5.07001900  | -1.31561100 | -0.55992200 |
| Br | -5.12390800 | -1.40116000 | -0.07389100 | Br | -5.00453000 | -1.24397100 | -0.54120700 |
| Br | -4.34025700 | 1.88402700  | -0.67530600 | Br | -4.16730900 | 2.00760100  | -0.29784600 |
|    | TS11-Br     |             |             |    | TS13-Br     |             |             |
| C  | -2.97946400 | 0.60963500  | 0.26280300  | C  | -2.94118400 | 0.66567800  | 0.30118000  |
| C  | -1.60396400 | 0.93947500  | 0.52499400  | C  | -1.62055300 | 0.95452000  | 0.46106600  |
| C  | -0.66451900 | -0.03075300 | 0.67351400  | C  | -0.63150500 | -0.06514500 | 0.56017500  |
| C  | -1.02644100 | -1.45163900 | 0.82188000  | C  | -0.96818300 | -1.40196700 | 0.56172400  |
| C  | -2.55959700 | -1.83641200 | 0.39066700  | C  | -2.26764500 | -1.97144800 | 0.68868800  |
| C  | -3.40019200 | -0.67096600 | 0.06512600  | C  | -3.52155700 | -0.66351600 | 0.45075500  |
| C  | 1.15692200  | -1.36948500 | 0.33557700  | C  | 1.19826400  | -1.36690900 | 0.22442400  |
| C  | 0.77533500  | -0.02751000 | 0.48903300  | C  | 0.80608400  | -0.02804500 | 0.37485100  |
| C  | 2.45806500  | -1.74405000 | 0.05142900  | C  | 2.50581200  | -1.76081500 | 0.01377900  |
| C  | 1.73334500  | 0.97470400  | 0.36006000  | C  | 1.77803700  | 0.96973000  | 0.29994400  |
| C  | 3.41242300  | -0.72971700 | -0.06161200 | C  | 3.46718800  | -0.75186300 | -0.05471400 |
| C  | 3.05513400  | 0.62085200  | 0.09386600  | C  | 3.10435400  | 0.60185600  | 0.08698400  |
| O  | 0.11700300  | -2.24267400 | 0.48179300  | O  | 0.11836500  | -2.20909100 | 0.31872700  |
| H  | 1.46991800  | 2.01878600  | 0.46678400  | H  | 1.52323100  | 2.01561500  | 0.40826800  |
| H  | -1.31505800 | 1.98007800  | 0.45593400  | H  | -1.30514800 | 1.98852700  | 0.40296200  |
| H  | -2.72875800 | -2.73510900 | -0.20112700 | H  | -2.41373100 | -2.95151600 | 0.23514600  |
| H  | 2.73027900  | -2.78322500 | -0.07008500 | H  | 2.77572600  | -2.80194400 | -0.09639900 |
| C  | -1.99660300 | -1.98389500 | 1.72436300  | C  | -3.29380800 | -1.48681700 | 1.59704000  |
| H  | -2.21177900 | -2.26285300 | 2.74116300  | H  | -4.01395900 | -2.07989500 | 2.14203800  |
| Br | 4.33463600  | 2.03164000  | -0.05055200 | Br | 4.39942700  | 2.00417700  | -0.00315400 |

|         |             |             |             |    |             |             |             |
|---------|-------------|-------------|-------------|----|-------------|-------------|-------------|
| Br      | 5.20629500  | -1.26147300 | -0.42664800 | Br | 5.27443100  | -1.28875700 | -0.34791800 |
| Br      | -5.09170100 | -1.11033700 | -0.69853200 | Br | -5.06792900 | -1.14206600 | -0.65833100 |
| Br      | -4.13618100 | 2.10937700  | -0.01390200 | Br | -4.12606800 | 2.12180000  | -0.10594700 |
| TS14-Br |             |             |             |    |             |             |             |
| C       | -2.94721700 | 0.67048000  | 0.29965000  |    |             |             |             |
| C       | -1.61035800 | 0.90984800  | 0.50055700  |    |             |             |             |
| C       | -0.64135400 | -0.12747700 | 0.60343400  |    |             |             |             |
| C       | -0.97056000 | -1.47539000 | 0.53426000  |    |             |             |             |
| C       | -2.27429500 | -2.01374200 | 0.64874300  |    |             |             |             |
| C       | -3.54733000 | -0.62506400 | 0.47579700  |    |             |             |             |
| C       | 1.19292500  | -1.40240300 | 0.17458400  |    |             |             |             |
| C       | 0.79667800  | -0.07731800 | 0.40993200  |    |             |             |             |
| C       | 2.49979600  | -1.77530600 | -0.07494200 |    |             |             |             |
| C       | 1.76291900  | 0.92816300  | 0.38321600  |    |             |             |             |
| C       | 3.45586200  | -0.75900300 | -0.09374600 |    |             |             |             |
| C       | 3.08871300  | 0.58159600  | 0.13343100  |    |             |             |             |
| O       | 0.11978700  | -2.25654700 | 0.22841800  |    |             |             |             |
| H       | 1.50431000  | 1.96424800  | 0.55743700  |    |             |             |             |
| H       | -1.25860600 | 1.93135900  | 0.42617900  |    |             |             |             |
| H       | -2.52979500 | -2.93343100 | 0.12903600  |    |             |             |             |
| H       | 2.77294100  | -2.80636500 | -0.25171100 |    |             |             |             |
| C       | -3.19623300 | -1.43048300 | 1.60527700  |    |             |             |             |
| H       | -3.03523300 | -1.12335000 | 2.63184800  |    |             |             |             |
| Br      | 4.37594700  | 1.99377800  | 0.11388800  |    |             |             |             |
| Br      | 5.26161000  | -1.26759000 | -0.44047700 |    |             |             |             |
| Br      | -5.14597300 | -1.13786500 | -0.51158300 |    |             |             |             |
| Br      | -4.03641800 | 2.14300600  | -0.27386500 |    |             |             |             |
